# Supplementary material for: Comprehensive Analysis of Transcriptome Sequencing Data in the Lung Tissues of COPD Subjects
Source: Int J Genomics. 2015 Mar 5;2015:206937. doi: 10.1155/2015/206937 (PMC4365374; doi:10.1155/2015/206937)
Supplement: Supplementary file 1 — Summary at a glance: The aim of this study was to identify gene expression profiling of lung tissue using recently developed RNA sequencing technology to define the molecular pathways that are dysregulated in COPD. Oxidative phosphorylation, protein degradation, and chromatin modification were the most dysregulated pathways in the lung tissues of COPD subjects in this study and these findings may have clinical and mechanistic implications in COPD. [file 206937.f1.zip › supplementary table 1. EdgeRDEGResults.xlsx]

## Sheet: EdgeRDEGResults
GeneName	FC(log2(COPD/Nor))	p value	q value	Relative Expression Levels
ABCA1	0.403435	5.91482e-07	0.00990081	11.8825
ABCB1	0.549654	1.07108e-06	0.0179288	4.46611
ABHD11	-0.392634	2.87332e-06	0.0480966	10.2707
ABHD2	0.367174	1.21176e-08	0.000202837	35.2499
ABL2	0.598961	1.23273e-07	0.00206346	4.33814
ABTB1	-0.359927	3.44076e-07	0.00575948	20.7749
ACACA	0.470406	5.82226e-07	0.00974589	7.32942
ACCS	-0.397931	9.1666e-07	0.015344	11.6789
ACP5	-0.287845	4.50367e-07	0.0075387	124.335
ACSL4	0.380604	8.42009e-09	0.000140944	29.9828
ADAM10	0.419069	6.62279e-10	1.10859e-05	25.6426
ADAM17	0.405625	1.40035e-08	0.000234404	19.7772
ADAMTS1	0.384472	1.61045e-10	2.69573e-06	63.4744
ADAMTS4	0.505886	8.89295e-14	1.48859e-09	26.1727
ADIPOQ	1.30116	2.49503e-06	0.0417642	0.416488
ADPRHL2	-0.360147	2.72457e-06	0.0456066	14.3741
AFF4	0.361557	2.27862e-06	0.0381419	14.7359
AGTRAP	-0.383984	5.29333e-08	0.00088605	20.777
AHCYL2	0.362374	7.70313e-08	0.00128943	26.8572
AHNAK	0.578982	1.62966e-24	2.72788e-20	161.457
AIP	-0.434437	4.76969e-11	7.98398e-07	29.6448
AK1	-0.403553	1.55765e-09	2.60734e-05	27.4991
AKAP12	0.707814	3.29567e-21	5.51662e-17	16.2841
AKAP13	0.413184	6.99979e-11	1.17169e-06	40.0344
AKT3	0.481921	3.10518e-08	0.000519777	9.36172
ALDH16A1	-0.478961	1.31765e-08	0.000220561	10.2522
ALDH6A1	0.477641	3.89083e-07	0.00651286	7.30878
ALG11	0.666606	2.96224e-10	4.9585e-06	5.2782
ALKBH7	-0.459657	4.44074e-09	7.43335e-05	13.212
ALS2CL	-0.442949	8.94186e-10	1.49678e-05	18.4691
AMT	-0.476224	8.20348e-09	0.000137318	10.8744
AMY1A	-0.973563	6.47621e-19	1.08405e-14	4.72459
AMY2B	-0.447645	1.35181e-09	2.26279e-05	16.8809
ANAPC11	-0.553229	1.6847e-17	2.82002e-13	32.9175
ANKHD1	0.510861	1.77862e-12	2.97723e-08	18.8382
ANKRD10	-0.3657	2.60961e-08	0.000436822	30.581
ANKRD17	0.444411	1.5292e-07	0.00255973	10.3474
ANKS3	-0.534412	1.14519e-06	0.0191693	4.57046
ANO9	-0.587392	2.70474e-08	0.000452746	5.07049
ANTXR2	0.562846	1.74669e-12	2.92378e-08	12.5487
AP1G2	-0.345323	2.55223e-06	0.0427217	17.2201
AP1S1	-0.437384	1.25921e-08	0.00021078	14.28
AP2S1	-0.389685	2.45952e-09	4.11699e-05	31.5907
APLN	-0.396809	1.20126e-06	0.0201079	11.3783
APOBEC3A	1.2555	2.17096e-36	3.63397e-32	6.82255
APOC1	-0.303307	2.45503e-08	0.000410948	778.275
APOLD1	0.409418	4.55706e-07	0.00762806	11.7431
APP	0.281144	5.03612e-07	0.00842996	202.943
APRT	-0.616129	5.50196e-21	9.20974e-17	31.2084
AQP9	0.488005	7.88219e-10	1.3194e-05	12.7799
AREG	0.480441	4.15588e-11	6.95652e-07	18.5398
ARF5	-0.492276	4.06731e-16	6.80826e-12	57.408
ARFGAP1	-0.35265	5.74047e-07	0.00960898	20.6462
ARHGAP31	0.414305	1.03658e-07	0.00173512	13.7053
ARHGAP4	-0.41418	4.59493e-08	0.000769146	15.1507
ARHGDIB	-0.268365	1.7252e-06	0.0288781	177.378
ARHGEF1	-0.366964	5.21608e-09	8.73119e-05	41.4392
ARID5B	0.47435	1.10529e-08	0.000185014	11.079
ARL16	-0.415877	1.24883e-08	0.000209042	17.5503
ARL5B	0.822278	4.51193e-15	7.55253e-11	5.46881
ARL6IP4	-0.356533	1.04284e-08	0.000174562	44.2151
ARMCX6	-0.418803	2.76652e-09	4.63088e-05	20.907
ARPC4	-0.281889	1.9388e-06	0.0324537	71.8579
ARPC4-TTLL3	-0.920852	3.52662e-07	0.0059032	1.27439
ARRDC1	-0.448511	1.36124e-10	2.27857e-06	21.7638
ARRDC3	0.327995	5.18846e-08	0.000868496	61.4287
ASH1L	0.437045	1.00993e-06	0.0169052	8.56584
ASPSCR1	-0.447433	5.01487e-08	0.00083944	11.114
ASXL2	0.827695	2.26202e-13	3.78639e-09	4.45
ATE1	0.477753	7.40236e-07	0.0123908	6.753
ATF3	0.481093	3.40772e-16	5.70419e-12	80.3273
ATF7IP	0.711155	3.65784e-13	6.12286e-09	6.64423
ATG4B	-0.370257	2.05681e-06	0.034429	13.4982
ATHL1	-0.758663	1.50929e-27	2.5264e-23	22.3428
ATL3	0.694073	6.59346e-13	1.10368e-08	6.92374
ATOX1	-0.455477	1.89215e-14	3.16728e-10	68.8118
ATP11A	0.401425	6.72989e-10	1.12652e-05	33.5446
ATP13A4	0.403179	5.02061e-08	0.000840399	17.1164
ATP1A1	0.278448	8.81715e-07	0.014759	150.634
ATP2A2	0.479617	5.77888e-13	9.67327e-09	29.0135
ATP2B4	0.380354	1.07094e-08	0.000179265	29.0345
ATP5D	-0.42519	1.10301e-08	0.000184633	16.2805
ATP5G1	-0.561111	3.78231e-20	6.33121e-16	53.2161
ATP5G2	-0.412684	7.71987e-13	1.29223e-08	104.982
ATP5H	-0.332827	3.78217e-09	6.33098e-05	151.355
ATP5I	-0.611609	1.1256e-27	1.88414e-23	183.745
ATP5J	-0.365736	3.74609e-09	6.27059e-05	45.9007
ATP5J2	-0.287846	2.71708e-07	0.00454812	187.421
ATP5L	-0.277308	2.21126e-06	0.0370143	81.4517
ATP5O	-0.346801	1.00084e-09	1.6753e-05	135.814
ATP6V0B	-0.371577	6.32423e-10	1.05861e-05	61.2408
ATP6V0E1	-0.442711	1.91568e-15	3.20666e-11	219.689
ATP6V1F	-0.39858	3.78616e-12	6.33765e-08	111.648
ATRN	0.453299	3.25412e-07	0.00544707	8.71871
ATXN1L	0.38495	1.26117e-06	0.0211107	12.7454
ATXN7	0.409196	8.70179e-07	0.0145659	10.8542
AUP1	-0.355387	1.50067e-08	0.000251197	41.67
AURKAIP1	-0.571974	5.4914e-18	9.19206e-14	29.3861
AVL9	0.545893	7.15885e-07	0.0119832	4.71575
B3GAT3	-0.671458	6.65387e-12	1.11379e-07	6.42828
B4GALT1	0.332854	1.63052e-07	0.00272932	38.939
B4GALT5	0.481263	5.71943e-12	9.57376e-08	22.2544
BABAM1	-0.321706	2.06821e-06	0.0346197	25.4638
BAD	-0.505011	5.45328e-14	9.12824e-10	26.896
BAG3	0.525799	5.42393e-15	9.07912e-11	27.3918
BANF1	-0.409577	7.91457e-12	1.32482e-07	63.733
BASP1	0.560438	3.3428e-13	5.59551e-09	14.4632
BAX	-0.339572	6.31526e-08	0.00105711	41.544
BCAT1	0.472639	4.7918e-07	0.00802099	7.41556
BCL6	0.326165	7.00128e-07	0.0117194	31.2729
BHLHE40	0.268439	2.92256e-06	0.0489208	116.768
BICC1	0.752706	7.37624e-10	1.23471e-05	3.56203
BLOC1S1	-0.382522	5.49505e-11	9.19816e-07	86.7043
BLVRA	-0.352594	8.9663e-09	0.000150087	50.7254
BLVRB	-0.394686	1.22277e-10	2.04679e-06	50.4872
BLZF1	0.44769	2.93681e-06	0.0491592	6.8857
BMP2	0.380228	3.96402e-08	0.000663538	23.3662
BMP2K	0.513027	9.23331e-07	0.0154556	5.39831
BOD1L	0.489484	8.86219e-07	0.0148344	6.29274
BPIFB1	0.799897	9.08764e-36	1.52118e-31	38.1422
BRAF	0.75545	9.25807e-08	0.00154971	2.46606
BRAT1	-0.489576	6.27884e-07	0.0105102	6.27692
BRI3	-0.331542	2.26844e-08	0.000379715	70.6507
BROX	0.50404	4.74101e-10	7.93598e-06	12.0786
BRP44L	-0.326649	1.02889e-07	0.00172226	50.6567
BSCL2	-0.482947	5.78257e-11	9.67945e-07	16.9489
BSG	-0.344969	1.40013e-09	2.34367e-05	126.794
BST2	-0.495448	7.59382e-18	1.27113e-13	107.185
BTG2	0.42968	5.33237e-14	8.92586e-10	130.939
C10orf116	-0.349984	3.98594e-10	6.67207e-06	189.287
C10orf118	0.525086	8.83286e-08	0.00147853	6.52283
C10orf125	-0.76254	2.53143e-26	4.23737e-22	19.3306
C10orf35	-0.551936	2.27689e-06	0.0381129	3.86976
C11orf10	-0.456772	2.38396e-16	3.99051e-12	220.459
C11orf31	-0.36934	1.87387e-07	0.00313668	20.4476
C11orf52	-0.378786	1.64588e-06	0.0275503	12.8311
C11orf67	-0.408067	3.134e-11	5.246e-07	49.6602
C11orf68	-0.397526	7.27166e-07	0.012172	12.1085
C11orf96	0.594165	8.37715e-23	1.40225e-18	61.934
C12orf10	-0.382582	1.33789e-06	0.022395	12.7031
C12orf57	-0.44341	1.53785e-14	2.5742e-10	102.192
C12orf62	-0.409932	4.90194e-12	8.20537e-08	70.6356
C14orf118	0.586626	6.20773e-07	0.0103911	3.8754
C14orf166	-0.288076	2.10419e-06	0.0352221	55.4564
C14orf49	0.790818	5.33088e-10	8.92336e-06	3.25086
C16orf13	-0.469003	1.49353e-10	2.50002e-06	17.4223
C16orf48	-0.554281	8.86601e-10	1.48408e-05	8.10665
C16orf79	-0.808856	2.66887e-09	4.46743e-05	2.63583
C16orf89	-0.330832	4.32793e-08	0.000724452	57.8394
C17orf37	-0.417489	3.39285e-10	5.67929e-06	28.4296
C17orf56	-0.663323	8.21183e-13	1.37458e-08	7.53425
C17orf61	-0.520815	8.18201e-18	1.36959e-13	56.9958
C17orf87	0.533426	1.19622e-12	2.00236e-08	16.0282
C17orf90	-0.718135	2.29576e-15	3.84287e-11	8.18
C19orf33	-0.394298	1.5429e-11	2.58267e-07	83.6121
C19orf43	-0.301832	2.36584e-07	0.00396017	85.3339
C19orf48	-0.519502	1.68945e-07	0.00282796	6.07047
C19orf53	-0.39335	9.38253e-10	1.57054e-05	35.1563
C19orf56	-0.527057	4.37109e-18	7.31677e-14	54.8753
C19orf59	-0.381277	1.14753e-10	1.92086e-06	73.4063
C19orf6	-0.358394	5.64479e-09	9.44882e-05	49.0096
C19orf60	-0.659746	2.62214e-20	4.3892e-16	19.6404
C19orf70	-0.757182	1.2881e-21	2.15616e-17	12.7356
C19orf71	-0.635104	4.70769e-08	0.00078802	3.92199
C19orf79	-0.438058	7.75758e-15	1.29854e-10	158.966
C1QA	-0.434	3.94396e-15	6.6018e-11	296.824
C1QB	-0.273106	7.96728e-07	0.0133364	276.296
C1orf123	-0.324217	1.18748e-06	0.0198772	27.915
C1orf15-NBL1	-1.72542	2.08144e-48	3.48412e-44	4.3659
C1orf159	-0.6435	1.04216e-06	0.0174447	2.82637
C1orf162	-0.359962	6.70879e-09	0.000112298	45.973
C1orf55	0.46766	4.1025e-09	6.86717e-05	12.6589
C1orf63	-0.334916	6.12202e-08	0.00102477	47.1425
C1orf86	-0.358404	1.44668e-06	0.024216	16.2832
C20orf46	-0.690158	3.84883e-17	6.44256e-13	11.4925
C21orf2	-0.437922	1.53212e-06	0.0256462	7.92112
C21orf33	-0.333699	2.95922e-07	0.00495343	32.4427
C22orf36	-0.640275	1.50592e-07	0.00252076	3.49629
C2CD4B	0.674049	1.8412e-10	3.08199e-06	5.3019
C2orf28	-0.355367	5.07371e-09	8.49288e-05	54.5531
C2orf54	-0.652497	4.62803e-12	7.74686e-08	7.207
C3	0.435319	1.19883e-14	2.00673e-10	171.275
C4orf34	0.351053	2.06548e-07	0.0034574	26.2106
C4orf7	-0.720477	1.8359e-09	3.07312e-05	3.62368
C5AR1	0.306769	1.83579e-06	0.0307294	35.6753
C5orf32	-0.431963	4.6913e-13	7.85276e-09	65.7538
C6orf1	-0.534206	1.29824e-11	2.17313e-07	12.8859
C6orf108	-0.40393	1.72779e-09	2.89215e-05	26.9179
C6orf125	-0.337867	3.40246e-07	0.00569537	28.9124
C6orf226	-0.628511	1.26889e-13	2.124e-09	10.1439
C7	0.51701	1.53686e-19	2.57255e-15	129.273
C7orf11	-0.442115	9.70549e-10	1.6246e-05	18.5876
C7orf23	-0.296748	2.45275e-06	0.0410565	40.9139
C7orf30	-0.36335	2.64084e-07	0.00442051	20.81
C7orf50	-0.378555	2.21173e-08	0.000370222	25.7013
C7orf55	-0.403177	2.59605e-08	0.000434553	18.4306
C7orf59	-0.457061	4.72633e-15	7.91141e-11	87.1236
C8orf4	0.275205	1.08446e-06	0.0181528	161.989
C9orf142	-0.792798	6.89441e-25	1.15406e-20	14.3162
C9orf16	-0.50591	2.26537e-13	3.792e-09	23.3341
C9orf21	0.448397	4.7085e-09	7.88157e-05	14.7213
C9orf23	-0.486301	1.05013e-07	0.00175781	7.90762
CA3	0.606335	5.98002e-12	1.001e-07	9.02952
CA9	-1.23615	1.46557e-07	0.00245321	0.624893
CAMK1D	0.475041	7.23802e-07	0.0121157	6.96002
CAMP	-0.582076	5.73022e-10	9.59182e-06	7.32083
CAMTA1	-0.308037	1.2727e-06	0.0213037	38.204
CAPG	-0.303967	1.26999e-07	0.00212583	106.872
CAPN3	-0.441307	3.26004e-10	5.45698e-06	21.2571
CAPNS1	-0.330388	8.55345e-09	0.000143176	111.367
CAV1	-0.281742	3.2223e-07	0.0053938	316.903
CBR1	-0.395413	6.27029e-09	0.000104958	24.9533
CBX6	0.399784	1.5593e-06	0.0261011	10.9341
CCDC12	-0.469366	1.38816e-13	2.32364e-09	38.6368
CCDC124	-0.396986	5.56214e-10	9.31046e-06	36.2375
CCDC130	-0.367419	1.50404e-06	0.0251761	14.5462
CCDC56	-0.65452	1.68794e-24	2.82545e-20	36.3151
CCDC75	0.582438	1.85378e-10	3.10305e-06	8.03291
CCDC80	0.448593	1.84028e-12	3.08045e-08	38.6904
CCDC84	-0.406191	4.4569e-08	0.00074604	16.439
CCL19	-0.795289	1.90159e-25	3.18307e-21	14.89
CCL24	-0.771122	1.77179e-17	2.9658e-13	8.06875
CCL3L3	-0.637914	2.18697e-09	3.66077e-05	5.01677
CCNT1	0.87052	1.35928e-11	2.2753e-07	3.18412
CCS	-0.411501	9.87088e-09	0.000165229	19.0048
CD151	-0.332038	5.50625e-09	9.21691e-05	127.501
CD163	0.549503	1.28646e-19	2.15341e-15	58.9057
CD209	0.632656	1.14833e-06	0.0192219	2.98109
CD300E	0.709264	1.22364e-12	2.04826e-08	6.26821
CD36	0.351428	1.2202e-08	0.000204249	48.9676
CD38	0.532211	6.88517e-08	0.00115251	6.35241
CD52	-0.699831	4.86119e-37	8.13715e-33	386.081
CD63	-0.26055	1.83139e-06	0.0306556	537.793
CD74	-0.311621	8.45506e-09	0.000141529	1679.55
CD81	-0.350772	3.41593e-10	5.71792e-06	198.798
CD84	0.647122	1.9271e-09	3.22578e-05	4.95671
CD93	0.423967	9.30692e-12	1.55789e-07	45.9644
CDC37	-0.308778	3.38394e-07	0.00566437	56.7083
CDH11	0.330083	6.69675e-07	0.0112097	28.9507
CDH5	0.300993	1.93881e-06	0.0324537	40.2532
CDK10	-0.495274	4.21012e-12	7.04732e-08	19.4858
CDK2AP2	-0.440888	1.62294e-10	2.71664e-06	23.267
CDK3	-1.07059	1.97762e-16	3.31033e-12	3.00985
CDK5RAP3	-0.493866	1.84904e-15	3.09511e-11	45.4179
CDKL5	1.55912	1.00122e-18	1.67595e-14	1.55657
CDKN1A	0.524186	3.30875e-19	5.53851e-15	90.1735
CDRT4	-1.10933	1.97128e-10	3.29973e-06	1.44466
CDYL2	0.84671	1.59073e-06	0.0266272	1.39409
CEBPB	0.383001	3.92697e-10	6.57336e-06	53.2019
CEBPD	0.299654	1.45355e-07	0.0024331	134.034
CEMP1	-0.620071	3.81154e-09	6.38014e-05	5.18832
CENPT	-0.363483	1.59205e-06	0.0266493	15.1667
CFH	0.305752	4.66878e-07	0.00781507	56.9698
CFL1	-0.260221	2.53741e-06	0.0424737	276.971
CFLAR	0.441067	1.77825e-13	2.97661e-09	66.1047
CHCHD1	-0.508504	4.74641e-13	7.94501e-09	21.2076
CHCHD2	-0.42523	6.51636e-14	1.09077e-09	139.217
CHCHD5	-0.495127	7.74187e-11	1.29591e-06	14.8371
CHCHD8	-0.36486	1.61951e-07	0.0027109	22.1147
CHD2	0.461447	1.86569e-10	3.12298e-06	18.8135
CHKA	-0.454997	2.363e-09	3.95543e-05	14.7844
CHKB	-0.376403	3.66354e-08	0.000613239	24.3192
CHMP2A	-0.335241	1.14207e-08	0.000191172	79.5746
CHST11	0.464356	5.49498e-08	0.000919805	9.92454
CHSY1	0.460909	1.05768e-09	1.77045e-05	15.5576
CIB1	-0.428656	2.04116e-13	3.41669e-09	86.7627
CILP	0.639562	4.61695e-07	0.00772831	3.21135
CIRBP	-0.281076	3.17347e-07	0.00531207	359.921
CKB	-0.537263	1.98131e-16	3.31651e-12	31.6858
CKS2	-0.328404	1.57918e-07	0.00264338	42.2519
CLC	0.94685	1.95557e-15	3.27343e-11	3.92048
CLCN3	0.468527	2.44364e-08	0.000409041	10.5816
CLDN3	-0.488476	4.88052e-08	0.00081695	8.48958
CLDN7	-0.357453	1.46328e-07	0.00244939	25.0179
CLEC3B	-0.511508	5.5334e-19	9.26235e-15	110.355
CLEC7A	0.304332	1.02447e-06	0.0171486	45.3982
CLIC3	-0.66456	2.04776e-27	3.42774e-23	51.5564
CLIP1	0.344442	2.309e-06	0.0386504	18.0333
CLK2	-0.351422	1.02556e-06	0.0171669	18.9437
CLMP	0.701955	7.75434e-10	1.298e-05	4.26879
CLOCK	0.79758	9.38445e-08	0.00157086	2.1398
CLPP	-0.342486	2.96358e-06	0.0496073	17.4517
CMIP	0.423273	4.31173e-08	0.000721741	14.234
CNKSR1	-0.503661	1.33102e-08	0.000222799	8.58526
CNOT1	0.46257	2.00063e-09	3.34886e-05	14.3426
CNTN1	0.80574	5.45721e-08	0.000913482	2.21795
COL14A1	0.801583	2.17007e-23	3.63249e-19	12.8543
COL15A1	0.443425	8.78862e-07	0.0147113	8.35416
COL1A1	0.824509	5.72674e-44	9.58599e-40	80.7498
COL1A2	0.463301	4.46936e-16	7.48127e-12	136.546
COL3A1	0.668652	9.34995e-31	1.56509e-26	106.167
COL5A1	0.400706	2.41068e-07	0.00403524	14.1095
COL5A2	0.408865	5.34986e-07	0.00895512	11.6462
COL6A3	0.439069	1.17135e-12	1.96071e-08	49.3666
COL6A6	0.432057	2.96919e-06	0.0497012	7.74253
COL8A1	0.559956	1.38241e-13	2.31401e-09	15.5042
COLEC12	0.432718	2.9572e-11	4.95006e-07	33.1701
COMMD3-BMI1	-1.08327	1.55909e-08	0.000260975	1.12818
COMMD4	-0.369167	2.21485e-08	0.000370744	29.8088
COMMD6	-0.448603	4.65792e-12	7.7969e-08	33.3823
COMMD7	-0.341233	2.84566e-06	0.0476335	17.9081
COMP	0.802791	1.58891e-06	0.0265967	1.62626
COMT	-0.331967	4.30188e-07	0.00720092	30.709
COMTD1	-0.781828	1.21772e-14	2.03835e-10	5.81157
COPB2	0.340187	8.95409e-08	0.00149883	38.6704
COPE	-0.425806	9.52248e-11	1.59397e-06	30.2824
COQ4	-0.389823	6.7484e-07	0.0112961	13.1274
COX17	-0.318278	1.51661e-08	0.000253865	167.728
COX4I1	-0.525413	7.74208e-21	1.29595e-16	180.079
COX4I2	-0.769752	1.3974e-27	2.3391e-23	20.7035
COX6A1	-0.608331	7.74742e-28	1.29684e-23	237.67
COX6B1	-0.535527	3.14635e-21	5.26667e-17	145.637
COX7A2	-0.442755	1.0392e-14	1.73952e-10	117.134
COX7B	-0.364226	5.64122e-11	9.44285e-07	233.774
COX7C	-0.533195	1.25113e-22	2.09426e-18	735.858
COX8A	-0.614329	4.68647e-28	7.84467e-24	200.029
CPEB4	0.393247	1.95607e-06	0.0327427	11.0346
CPXM1	0.756522	4.69175e-12	7.85351e-08	4.8968
CRABP2	-0.952026	4.19466e-28	7.02144e-24	9.62822
CRIP1	-0.873053	1.79428e-56	3.00345e-52	386.346
CRIP2	-0.537123	5.90452e-20	9.88358e-16	80.3803
CRISPLD2	0.373161	1.40798e-08	0.000235682	31.0089
CRK	0.384896	1.02435e-08	0.000171467	27.2747
CRYAB	-0.493837	4.71307e-14	7.88921e-10	31.4186
CRYGS	-0.717557	2.27319e-07	0.0038051	2.46949
CSF1	0.44778	1.32499e-11	2.21791e-07	30.0157
CSF3	0.345547	9.52065e-07	0.0159366	21.1006
CSN1S1	3.38489	6.31808e-36	1.05758e-31	0.801119
CSRNP1	0.482024	2.25736e-14	3.7786e-10	41.6964
CST1	-1.04031	2.10877e-07	0.00352987	0.997885
CST6	-0.559238	2.7186e-14	4.55066e-10	17.2688
CTBP1	-0.300549	2.53903e-06	0.0425009	36.5888
CTSD	-0.2916	9.20095e-08	0.00154015	557.676
CTSH	-0.29893	6.06028e-08	0.00101443	303.261
CXCL1	0.42796	5.86675e-12	9.82035e-08	46.1963
CXCL10	0.902708	3.37817e-41	5.65473e-37	28.5511
CXCL11	1.29723	6.34509e-44	1.06211e-39	8.4177
CXCL12	0.389639	3.17207e-10	5.30972e-06	47.6183
CXCL3	0.380641	6.49741e-09	0.00010876	31.5556
CXCR1	0.853976	2.40037e-09	4.01799e-05	2.3752
CXCR2	0.862136	8.66873e-15	1.45106e-10	4.64735
CYB5R2	-0.464644	2.38315e-06	0.0398916	6.2645
CYBA	-0.328671	3.6219e-09	6.06271e-05	217.977
CYHR1	-0.477362	3.47153e-09	5.811e-05	11.7759
CYP1B1	0.672652	4.10815e-16	6.87663e-12	11.3941
CYP27A1	-0.30899	4.27657e-07	0.00715855	52.538
CYP4B1	-0.322796	1.84853e-08	0.000309425	110.213
CYP7B1	0.781952	9.15702e-08	0.00153279	2.247
CYR61	0.264571	2.27627e-06	0.0381025	204.492
CYorf15A	0.431654	2.77528e-07	0.00464554	10.6076
D2HGDH	-0.482376	1.08389e-08	0.000181433	10.1957
DAAM1	0.483324	4.46993e-07	0.00748221	6.95905
DAD1	-0.272294	1.3857e-06	0.0231952	155.14
DCTN3	-0.311801	7.06675e-07	0.011829	41.2449
DCTPP1	-0.465388	5.32544e-09	8.91426e-05	12.3945
DCUN1D3	0.533438	2.39957e-09	4.01663e-05	8.64777
DCXR	-0.456115	1.05463e-12	1.76535e-08	36.1505
DDI2	1.16862	5.2505e-16	8.78881e-12	2.48052
DDIT3	-0.331391	1.23453e-06	0.0206648	24.3728
DDR2	0.957342	6.22387e-16	1.04181e-11	3.9777
DDT	-0.60908	6.97717e-24	1.16791e-19	58.6015
DDX21	0.619343	1.30657e-18	2.18706e-14	21.6754
DDX39A	-0.344719	1.21385e-06	0.0203187	20.0433
DDX3X	0.45466	1.84202e-14	3.08335e-10	73.3799
DDX3Y	0.3567	5.72938e-08	0.00095904	31.0277
DEFB1	1.04917	8.33355e-33	1.39495e-28	9.81614
DGCR6L	-0.365344	3.86863e-07	0.0064757	18.8832
DGUOK	-0.427097	2.18475e-10	3.65705e-06	26.5579
DHRS1	-0.506248	1.4101e-11	2.36037e-07	15.8767
DLC1	0.326609	1.38874e-07	0.00232461	47.0054
DMAP1	-0.364848	1.8575e-06	0.0310927	14.4948
DMBT1	0.656392	1.58371e-23	2.65097e-19	32.4366
DMPK	-0.395018	7.77087e-08	0.00130077	17.1445
DNAJA1	0.351491	6.09222e-10	1.01978e-05	142.106
DNAJB1	0.535766	3.00862e-20	5.03612e-16	97.9943
DNAJB14	0.431215	9.04895e-07	0.015147	8.98017
DNAJB4	0.338067	7.63831e-07	0.0127858	24.5318
DNAJC4	-0.38321	1.41567e-06	0.0236969	12.5332
DOCK5	0.782161	1.315e-11	2.20118e-07	4.1983
DOK2	-0.419827	6.79638e-10	1.13765e-05	25.0808
DPM2	-0.395041	1.62135e-06	0.0271397	10.9851
DPM3	-0.789414	6.93365e-40	1.16062e-35	67.5433
DPP7	-0.326252	3.55167e-07	0.00594513	35.83
DPP8	0.532229	1.99938e-07	0.00334675	5.72898
DPY30	-0.314581	6.26883e-07	0.0104934	40.1757
DUSP23	-0.586207	7.30717e-17	1.22315e-12	21.28
DYNC1H1	0.515329	1.68323e-12	2.81755e-08	18.1917
DYNLL1	-0.383938	9.95794e-12	1.66686e-07	156.909
DYNLRB1	-0.386467	8.3822e-12	1.4031e-07	146.146
DYRK3	0.691744	3.30381e-13	5.53024e-09	7.272
EBP	-0.416725	1.49686e-08	0.000250559	17.1206
ECH1	-0.307599	2.20955e-07	0.00369856	69.6507
ECHDC2	-0.501175	5.72556e-13	9.58401e-09	22.3303
ECI1	-0.366974	2.50329e-06	0.0419027	13.4639
EDF1	-0.542302	2.03099e-22	3.39967e-18	226.273
EDIL3	0.407378	1.30985e-07	0.00219256	14.0483
EEF1A2	-1.33202	7.2585e-08	0.001215	0.544016
EEF1D	-0.362118	1.91169e-10	3.19997e-06	130.836
EFCAB4A	-0.542967	5.50565e-10	9.21591e-06	9.02451
EFNA1	-0.420506	1.73204e-11	2.89927e-07	43.1034
EGFL7	-0.715962	9.63963e-30	1.61358e-25	40.1007
EGFR	0.776704	1.06106e-17	1.77612e-13	8.4935
EGLN2	-0.333221	3.04791e-07	0.00510189	32.4611
EGR1	0.558063	8.79417e-24	1.47206e-19	306.713
EGR3	0.62103	3.01135e-16	5.0407e-12	15.3543
EHD4	0.394663	5.55847e-09	9.30432e-05	26.2981
EIF2AK2	0.812632	5.27996e-21	8.83812e-17	9.98072
EIF2C2	0.936047	7.18721e-13	1.20307e-08	3.11411
EIF3K	-0.415421	1.15678e-12	1.93633e-08	85.2969
EIF4EBP1	-0.439285	2.45037e-09	4.10167e-05	17.0582
EIF4EBP3	-0.498264	4.79942e-11	8.03374e-07	15.2085
ELK3	0.598446	2.86844e-16	4.80148e-12	17.9196
ELMO3	-0.557938	1.37681e-07	0.00230464	5.09484
ELOF1	-0.331475	1.52488e-06	0.025525	23.2237
EMILIN2	0.4213	1.25141e-07	0.00209473	12.6008
EMP1	0.46653	2.80301e-16	4.69196e-12	136.066
EMP3	-0.488974	1.15018e-15	1.92529e-11	52.9742
ENTPD4	0.526301	1.05225e-10	1.76136e-06	11.8821
ENTPD5	0.621965	8.91552e-08	0.00149237	4.01225
EP300	0.449395	8.68982e-09	0.000145459	13.6283
EPOR	-0.602679	1.20208e-11	2.01216e-07	8.62782
EPS8L2	-0.462477	5.13033e-13	8.58765e-09	36.0099
EPSTI1	0.412918	2.17343e-08	0.000363811	17.1058
ERAP1	0.336441	1.88244e-06	0.0315101	20.899
ERC1	0.599806	1.0499e-09	1.75742e-05	6.45534
EREG	0.57504	2.3769e-06	0.0397869	3.57963
ERN1	0.922339	4.24981e-18	7.11375e-14	5.3533
ERO1L	0.394071	1.64238e-06	0.0274918	11.2662
ERV3-1	0.560478	9.70757e-08	0.00162495	5.29825
ETFB	-0.62213	9.37989e-23	1.5701e-18	39.1839
ETV3	0.710759	1.41995e-18	2.37686e-14	12.4847
EVC	0.582646	1.34892e-08	0.000225795	5.6893
EXOC4	0.41576	1.66675e-08	0.000278997	17.2899
EXOC6B	0.782871	1.80252e-12	3.01724e-08	4.65526
EXOSC4	-0.512533	3.19878e-10	5.35444e-06	11.3927
F13A1	0.705332	5.16941e-24	8.65308e-20	22.6322
F3	0.323095	1.74185e-07	0.00291569	48.7673
FABP4	-0.371644	3.16764e-11	5.30232e-07	192.774
FADS3	-0.431448	6.06213e-09	0.000101474	16.5651
FAM107A	0.533192	6.78896e-15	1.1364e-10	24.7353
FAM127A	-0.310491	6.75731e-07	0.0113111	43.1355
FAM127B	-0.557165	2.84122e-16	4.75592e-12	24.9088
FAM129A	0.383735	5.51284e-07	0.00922794	14.503
FAM156A	-0.538322	4.67577e-11	7.82678e-07	11.2514
FAM160A1	0.868028	6.8869e-07	0.011528	1.45406
FAM162A	-0.36857	1.06415e-08	0.000178128	34.5474
FAM162B	-0.459499	2.73771e-09	4.58266e-05	13.9812
FAM168A	0.679085	1.84426e-14	3.0871e-10	9.01744
FAM176B	-0.431567	4.97148e-07	0.00832176	9.56761
FAM189A2	-0.345778	4.79685e-07	0.00802944	23.71
FAM193B	-0.519421	6.10816e-13	1.02245e-08	18.6299
FAM195A	-0.477006	2.81985e-06	0.0472014	5.66547
FAM195B	-0.32253	1.21017e-06	0.0202571	28.4749
FAM21B	-1.62285	1.57402e-07	0.00263475	0.218485
FAM26F	0.839535	6.90535e-19	1.15589e-14	7.51454
FAM3A	-0.501538	1.20055e-07	0.00200959	7.02401
FAM50A	-0.494941	1.86511e-14	3.122e-10	34.0303
FAM63B	0.676846	4.08064e-07	0.00683058	2.8043
FAM96B	-0.450253	3.40998e-13	5.70797e-09	46.9393
FAM98B	0.34301	2.35793e-06	0.0394695	18.3303
FASTK	-0.677964	1.02086e-18	1.70882e-14	14.3825
FAU	-0.467139	1.37007e-17	2.29336e-13	491.747
FBL	-0.368422	1.5191e-09	2.54283e-05	53.1839
FBLN2	0.351883	2.96247e-06	0.0495888	15.6665
FBN1	0.679149	3.85256e-15	6.44879e-11	9.79682
FBP1	-0.431765	7.79352e-14	1.30456e-09	100.354
FBXL15	-0.582148	1.66042e-07	0.00277937	4.43356
FBXW5	-0.349334	2.77101e-07	0.00463839	24.9864
FCAR	0.795567	1.79971e-07	0.00301254	2.05471
FCGR3B	0.734849	2.23494e-22	3.74106e-18	15.6377
FCN1	0.504093	7.23459e-12	1.211e-07	17.4687
FDX1L	-0.552554	8.46413e-11	1.41681e-06	9.93598
FEM1B	0.658425	4.98096e-12	8.33762e-08	7.11658
FGA	1.0769	5.15402e-12	8.62732e-08	2.013
FGG	1.72419	2.07045e-147	3.46573e-143	34.6481
FGL2	0.315397	1.71776e-06	0.0287535	30.0374
FHOD1	-0.3703	1.25191e-07	0.00209557	21.3972
FILIP1	0.603955	6.91395e-08	0.00115733	4.50652
FILIP1L	0.374601	6.7501e-08	0.0011299	22.7978
FIS1	-0.448516	3.17604e-14	5.31637e-10	74.0356
FKBP2	-0.466561	1.78429e-14	2.98673e-10	54.1108
FKBP5	0.549906	3.27291e-15	5.47852e-11	22.3888
FKBP8	-0.512851	3.1695e-17	5.30543e-13	55.1731
FLNB	0.350411	6.39206e-07	0.0106997	21.426
FN1	0.346467	2.91342e-10	4.87677e-06	428.756
FNIP2	0.501977	4.47911e-09	7.49758e-05	9.98559
FOLR1	-0.367092	1.71665e-10	2.87351e-06	107.505
FOLR3	-0.686431	2.78501e-11	4.66182e-07	5.49148
FOSB	0.677715	6.44383e-34	1.07863e-29	264.303
FOSL1	0.616573	1.38313e-12	2.31522e-08	9.60015
FOSL2	0.929875	1.12006e-51	1.87487e-47	55.4682
FOXO3	0.382606	1.08572e-06	0.0181738	13.3285
FTL	-0.344556	1.73403e-10	2.9026e-06	3837.66
FUT11	0.544605	6.83531e-10	1.14416e-05	9.00198
FXYD1	-0.435267	1.07273e-11	1.79564e-07	36.0295
FXYD3	-0.396696	7.97248e-11	1.33451e-06	52.7079
GABARAP	-0.377221	1.05144e-11	1.76001e-07	248.993
GABRE	-0.434517	2.31881e-06	0.0388145	7.67983
GADD45G	-0.484235	8.01109e-09	0.000134098	10.3855
GADD45GIP1	-0.394317	1.05002e-08	0.000175763	23.454
GALK1	-0.436722	1.98285e-06	0.0331909	7.72269
GALNT5	0.718628	3.6264e-14	6.07022e-10	7.26058
GANC	0.588421	4.34021e-11	7.26507e-07	8.80928
GAS6	-0.283995	1.55063e-06	0.0259561	73.1653
GAS7	0.478817	6.93357e-09	0.000116061	11.3018
GBP1	0.332393	2.43992e-07	0.00408418	35.2167
GCHFR	-0.385266	1.77021e-09	2.96316e-05	36.4025
GDPD3	-0.700514	5.00645e-11	8.38029e-07	5.0304
GEM	0.349791	1.12256e-07	0.00187906	30.6163
GFOD1	0.58847	3.2542e-07	0.0054472	4.11573
GGTLC1	-0.602891	1.16399e-13	1.94841e-09	11.6344
GMFG	-0.306612	9.53643e-08	0.0015963	109.472
GNAQ	0.727276	2.63456e-28	4.40999e-24	31.2641
GNB2	-0.349414	1.11612e-08	0.000186827	51.725
GNB2L1	-0.447424	3.88157e-16	6.49736e-12	378.397
GNG11	-0.411473	5.78141e-13	9.6775e-09	122.389
GNG5	-0.409296	1.09226e-12	1.82834e-08	108.61
GNG8	-1.5424	4.12916e-35	6.91179e-31	3.69653
GNLY	-0.564445	1.8146e-16	3.03746e-12	24.2977
GOLIM4	0.559743	7.40027e-17	1.23873e-12	27.679
GOLT1A	-0.538673	2.64197e-07	0.0044224	5.24058
GPR116	0.289816	9.21098e-07	0.0154183	76.1768
GPR15	0.839669	1.80121e-06	0.0301504	1.41126
GPRIN3	0.942626	1.67221e-12	2.79911e-08	2.91453
GPSM1	-0.586316	1.84061e-11	3.081e-07	9.12986
GPX1	-0.26329	2.75858e-06	0.0461758	172.757
GPX4	-0.332084	5.54687e-09	9.2849e-05	126.403
GRB7	-0.450054	1.62847e-06	0.027259	7.2623
GREM1	1.3531	1.14659e-13	1.91928e-09	1.39593
GRN	-0.290034	1.81085e-07	0.00303119	232.003
GRP	-0.654945	7.68644e-07	0.0128663	2.82482
GSDMB	-0.47366	8.91125e-08	0.00149165	8.57005
GSDMD	-0.424262	2.97871e-10	4.98606e-06	26.5188
GSTO1	-0.322634	2.35143e-08	0.000393607	100.666
GSTP1	-0.35981	1.01313e-10	1.69587e-06	222.628
GSTT2B	-1.0737	1.55083e-12	2.59594e-08	2.06166
GTF2A1	0.769872	1.83223e-14	3.06697e-10	6.15263
GTF3C3	0.631644	4.19019e-13	7.01396e-09	9.51668
GXYLT2	0.601858	1.34378e-06	0.0224936	3.40083
GYPC	-0.343242	2.38255e-08	0.000398814	49.4486
GZMA	-0.415654	2.61041e-09	4.36957e-05	22.1768
GZMH	-0.418764	4.29302e-07	0.00718609	10.841
H2AFB2	-0.917745	7.62565e-08	0.00127646	1.51107
HAS2	0.637173	3.73704e-13	6.25543e-09	9.29762
HBEGF	0.350589	1.21244e-08	0.00020295	50.7026
HBXIP	-0.335557	1.44413e-08	0.000241734	72.129
HCFC1R1	-0.386926	1.08186e-08	0.000181093	25.6173
HCST	-0.692212	1.56279e-27	2.61595e-23	38.3529
HDAC10	-0.600622	4.84003e-09	8.10173e-05	5.57878
HDHD3	-0.593242	2.13213e-08	0.000356898	5.043
HEG1	0.422205	4.12796e-10	6.90979e-06	26.4086
HERC1	0.537838	2.56012e-07	0.00428538	5.47113
HEXDC	-0.53243	6.94492e-10	1.16251e-05	9.4798
HIF1A	0.338555	1.05482e-07	0.00176567	38.2865
HIGD1B	-0.671269	3.96922e-25	6.64408e-21	33.5755
HIGD2A	-0.534853	1.6548e-18	2.76997e-14	54.0435
HINT2	-0.508875	6.46663e-14	1.08245e-09	25.4459
HIPK1	0.422328	1.75425e-08	0.000293644	16.0511
HIPK2	0.682897	6.7694e-15	1.13313e-10	9.25864
HIPK3	0.889309	3.34003e-26	5.59088e-22	11.1592
HIST1H1C	-0.349618	2.16643e-06	0.0362639	16.9168
HIST1H4A	1.91768	2.11466e-11	3.53973e-07	0.409219
HIVEP2	0.59747	4.02337e-08	0.000673471	4.80843
HLA-DRB5	-0.393438	2.71728e-12	4.54846e-08	164.613
HMBOX1	1.35516	5.95279e-26	9.96438e-22	3.44351
HMGN2	-0.360823	2.01572e-10	3.37412e-06	137.993
HMGN3	-0.270005	2.03393e-06	0.0340459	131.29
HMOX1	-0.658744	8.9866e-27	1.50427e-22	50.0157
HOOK2	-0.390872	6.01824e-07	0.0100739	13.1547
HP	0.606356	1.47144e-21	2.46304e-17	40.6553
HPN	-0.480763	1.87497e-07	0.00313851	7.55435
HRAS	-0.652955	1.01335e-16	1.69625e-12	13.0821
HSD17B10	-0.343761	2.32816e-07	0.0038971	28.4883
HSP90AA1	0.348864	3.84124e-10	6.42985e-06	234.777
HSPB1	-0.520417	1.13849e-20	1.90572e-16	208.186
HSPG2	0.449019	8.36824e-11	1.40076e-06	23.5127
HSPH1	0.403341	5.46151e-10	9.14202e-06	32.944
HUWE1	0.489964	1.94404e-10	3.25412e-06	14.451
ICAM1	0.327426	7.71577e-09	0.000129154	148.488
ID1	-0.332576	7.66145e-09	0.000128245	104.285
IDH3G	-0.399288	3.66457e-08	0.000613412	18.2693
IDO1	0.440352	2.69137e-08	0.000450508	12.8441
IFI27	-0.480308	4.63371e-18	7.75636e-14	259.436
IFI27L1	-0.49859	1.01607e-09	1.7008e-05	11.388
IFI27L2	-0.717156	1.27395e-33	2.13247e-29	72.0153
IFI30	-0.268204	9.94989e-07	0.0166551	425.471
IFI6	-0.362198	1.21613e-10	2.03567e-06	168.261
IFITM3	-0.255843	2.94741e-06	0.0493367	464.695
IFT43	-0.520544	7.71145e-15	1.29082e-10	27.4528
IGF1	0.581037	4.39371e-09	7.35462e-05	6.34012
IGF2R	0.52532	1.67231e-14	2.79928e-10	24.8019
IGFBP4	0.264157	2.95664e-06	0.0494911	158.546
IGFBP5	0.434688	3.25881e-12	5.45492e-08	44.9802
IGFBP6	-0.431366	1.77146e-11	2.96525e-07	35.6882
IGJ	0.266599	1.00186e-06	0.0167702	793.352
IGLL5	-0.43104	5.75618e-14	9.63526e-10	112.36
IKZF3	0.723964	1.50318e-07	0.00251618	2.60963
IKZF5	0.527687	8.7646e-09	0.000146711	7.87273
IL11RA	-0.394332	9.08897e-07	0.015214	12.1108
IL18	-0.343243	5.94445e-07	0.00995042	23.7604
IL1B	0.566609	2.89641e-15	4.8483e-11	19.6747
IL1R1	0.365991	3.38079e-09	5.6591e-05	47.7181
IL1RL1	0.630866	2.31217e-14	3.87035e-10	11.3562
IL32	-0.429594	8.31282e-14	1.39148e-09	107.355
IL4I1	0.689908	6.96801e-09	0.000116638	3.83755
IL6	0.307872	8.28302e-08	0.0013865	115.033
IL7R	0.482616	7.87196e-13	1.31769e-08	26.3641
IL8	0.364398	4.01023e-10	6.71273e-06	91.5953
IMP3	-0.343289	7.47023e-07	0.0125044	22.538
INHBA	0.965906	4.24445e-32	7.10479e-28	12.3479
IQGAP1	0.314409	3.00854e-07	0.00503599	51.0692
IRF3	-0.552522	1.14139e-15	1.91058e-11	23.2973
ISOC2	-0.416786	2.83663e-07	0.00474824	11.5577
ITGA1	0.357307	1.82372e-06	0.0305272	16.0113
ITGA6	0.328166	2.91002e-06	0.0487109	21.5899
ITGA8	0.68792	3.43245e-15	5.74557e-11	9.46181
ITGA9	0.76096	2.8379e-12	4.75036e-08	4.89092
ITGB6	0.5757	8.40562e-15	1.40702e-10	16.9438
ITGBL1	0.485495	1.06144e-10	1.77675e-06	15.8854
ITIH5	0.402129	7.19499e-07	0.0120437	11.756
ITLN1	-0.50949	2.94157e-17	4.92389e-13	57.1111
ITLN2	-0.670331	9.72934e-16	1.62859e-11	10.7033
ITPA	-0.404463	3.69742e-09	6.18912e-05	23.8917
ITPKA	-1.86505	1.23932e-12	2.0745e-08	0.496976
ITPKC	0.488762	3.59076e-10	6.01058e-06	13.7957
ITSN2	0.520255	6.7442e-10	1.12891e-05	10.5053
JOSD2	-0.648163	8.99068e-18	1.50495e-13	15.4047
JTB	-0.341097	6.21455e-08	0.00104025	40.623
JUNB	0.448914	4.42331e-16	7.40418e-12	358.491
JUND	0.33989	3.94434e-09	6.60243e-05	106.68
KAT2A	-0.401242	5.06399e-08	0.000847662	16.99
KAT6A	0.488617	2.44297e-08	0.000408929	9.10609
KCNA3	0.783914	3.20771e-11	5.36939e-07	3.95605
KCTD20	0.440043	3.47545e-09	5.81755e-05	16.4981
KDELR1	-0.302754	1.42957e-06	0.0239296	41.5172
KDM6B	0.575526	5.24608e-15	8.78142e-11	17.6309
KIAA0754	1.36136	4.52904e-16	7.58116e-12	1.75568
KIAA0889	0.667106	1.08053e-08	0.000180869	4.00525
KIAA1324L	0.421316	1.24938e-06	0.0209133	9.48088
KIAA1704	0.422092	1.10956e-07	0.00185729	12.6801
KIDINS220	0.378275	1.57148e-07	0.0026305	19.0482
KIF13A	0.506217	5.90126e-10	9.87812e-06	11.7085
KIFC2	-0.589268	5.62465e-11	9.41511e-07	8.22978
KIFC3	-0.394529	5.06755e-08	0.000848257	18.3147
KIRREL	0.610077	6.78187e-11	1.13522e-06	7.57046
KLF2	0.69248	3.75725e-29	6.28926e-25	50.7217
KLF6	0.466572	6.36628e-16	1.06565e-11	108.729
KLF7	0.816567	4.48151e-18	7.5016e-14	7.57168
KLK5	-0.85669	2.18144e-07	0.00365151	1.58952
KLRB1	-0.411515	5.19177e-09	8.69051e-05	21.0257
KLRK1	-0.382478	2.93546e-06	0.0491366	11.3718
KRT14	1.79446	2.87618e-19	4.81443e-15	1.21747
KRT15	0.830204	3.93276e-15	6.58305e-11	5.55698
KRT16	1.31273	2.00931e-09	3.36339e-05	0.86218
KRT19	-0.276758	1.12994e-06	0.018914	130.356
KRT31	1.89212	6.18472e-10	1.03526e-05	0.239118
KRT5	1.07532	1.19274e-30	1.99652e-26	8.33292
KRT6A	1.24595	3.85494e-13	6.45279e-09	1.6365
KRTCAP2	-0.602659	2.61572e-25	4.37845e-21	96.5355
KRTCAP3	-0.413574	9.03708e-07	0.0151272	10.2555
LAGE3	-0.569416	5.07335e-08	0.000849228	5.29579
LAMA2	0.569922	1.61808e-09	2.7085e-05	7.26672
LAMA4	0.374559	2.90039e-08	0.000485497	26.0961
LAMC1	0.349328	3.39303e-07	0.00567959	24.4366
LAMP3	0.277452	1.16875e-06	0.0195638	127.751
LAT	-0.601294	4.97416e-12	8.32625e-08	9.20728
LATS1	0.619605	6.4704e-08	0.00108308	4.17995
LCAT	-0.656275	5.83402e-17	9.76557e-13	13.2127
LDLR	0.554017	3.88683e-19	6.50617e-15	48.6451
LGALS1	-0.548288	1.24169e-23	2.07847e-19	506.499
LGALS2	-0.437835	5.05189e-07	0.00845636	9.1366
LGALS3	-0.357055	1.00446e-10	1.68136e-06	298.976
LIF	0.844262	1.45275e-28	2.43175e-24	15.4378
LIME1	-0.768159	4.05498e-12	6.78763e-08	4.53786
LIMS2	-0.346206	1.07103e-07	0.0017928	32.3642
LMF2	-0.367071	4.59859e-07	0.00769757	17.9207
LMNA	0.282447	5.47216e-07	0.00915985	167.673
LMO4	-0.386419	1.3022e-06	0.0217975	12.3249
LNPEP	0.995412	5.30405e-11	8.87844e-07	2.13333
LOC100128071	-0.801057	9.99011e-11	1.67225e-06	3.35735
LOC653486	-1.45973	1.81706e-08	0.000304158	0.467236
LONP2	0.423863	8.82769e-07	0.0147767	9.76569
LONRF3	0.644214	4.39848e-09	7.36261e-05	4.72506
LRCH3	0.572713	2.08039e-08	0.000348236	5.74449
LRCH4	-0.39789	1.40497e-07	0.00235177	15.2529
LRP1	0.458633	1.70323e-13	2.85104e-09	46.219
LRRC32	0.386828	1.83311e-08	0.000306844	24.1074
LRRC36	-0.443506	1.35194e-08	0.000226302	13.4278
LRRK2	0.452289	1.61062e-11	2.69601e-07	27.7537
LRRN4	0.504389	1.31129e-07	0.00219497	7.01499
LSM10	-0.365098	6.56837e-07	0.0109948	17.2994
LSM3	-0.374481	2.74561e-10	4.59587e-06	70.7144
LSM4	-0.354793	2.60759e-07	0.00436484	23.2576
LSM7	-0.782389	1.57619e-37	2.63838e-33	53.4869
LTC4S	-0.48001	2.20094e-07	0.00368416	7.58516
LUC7L	-0.531663	5.89378e-16	9.8656e-12	30.6618
LUZP1	0.509388	7.37582e-07	0.0123464	5.69758
LY6D	1.54234	5.71696e-10	9.56962e-06	0.59476
LY6E	-0.277771	1.08247e-06	0.0181195	127.375
LY6H	-1.07651	3.57455e-10	5.98344e-06	1.4602
LYPLA2	-0.457824	8.83379e-11	1.47869e-06	20.7508
LYVE1	0.324566	2.12984e-06	0.0356514	24.3991
LZTS2	-0.437267	1.92082e-08	0.000321526	13.5622
MACF1	0.349853	4.91525e-08	0.000822764	36.6053
MAFF	0.588728	1.1447e-19	1.91611e-15	34.5753
MAL	-0.436049	1.10843e-06	0.018554	8.39984
MAML2	0.535349	3.0545e-07	0.00511293	5.38424
MAN1A1	0.499907	3.18281e-14	5.3277e-10	30.7189
MAN1A2	0.626393	3.48208e-09	5.82866e-05	5.18323
MAN2A1	0.579154	3.34593e-08	0.000560075	5.29589
2014-03-06	0.46845	2.01975e-10	3.38086e-06	17.4276
2014-03-08	0.531655	1.87581e-09	3.13992e-05	8.91306
MBD3	-0.46873	4.48309e-10	7.50424e-06	15.5877
MCL1	0.493569	8.99214e-19	1.50519e-14	241.703
MDK	-0.416877	5.26601e-10	8.81477e-06	26.7142
MDN1	0.653311	1.94424e-06	0.0325446	2.68913
MDP1	-0.472252	4.31192e-09	7.21772e-05	12.0319
MEA1	-0.386679	2.4714e-09	4.13688e-05	33.1468
MED13L	0.456349	7.92969e-09	0.000132735	12.9644
MEGF9	0.393502	1.09587e-07	0.00183438	16.7812
METTL17	-0.44703	1.09037e-08	0.000182518	13.3307
MFHAS1	0.473123	3.15836e-07	0.00528678	7.59627
MFSD10	-0.493292	9.05972e-13	1.51651e-08	23.1302
MGAT5	0.902681	2.90163e-18	4.85705e-14	5.74165
MGMT	-0.362717	5.80982e-07	0.00972506	18.1683
MGST3	-0.412367	6.44313e-11	1.07852e-06	40.3155
MIB2	-0.474354	9.35081e-07	0.0156523	6.51027
MICAL1	-0.329783	2.78358e-06	0.0465943	21.0092
MICAL2	0.781623	9.68944e-20	1.62191e-15	10.1472
MICALCL	0.730696	7.13078e-10	1.19362e-05	3.90756
MIDN	0.403527	8.55315e-10	1.43171e-05	31.4445
MIF	-0.785244	1.21528e-41	2.03425e-37	96.104
MIIP	-0.437388	8.12908e-08	0.00136073	11.4068
MLL2	0.447044	2.34433e-07	0.00392417	9.61199
MLL3	0.459242	2.7226e-06	0.0455737	6.51741
MLL5	0.397498	9.60525e-08	0.00160782	16.4652
MLPH	-0.303488	2.10321e-06	0.0352056	36.2034
MMP1	0.686459	1.68615e-06	0.0282245	2.35122
MMP19	0.390301	6.89896e-08	0.00115482	18.9388
MMP2	0.3854	7.0615e-11	1.18202e-06	76.824
MMP25	0.658998	1.67212e-06	0.0279896	2.59313
MMRN1	0.598449	2.56951e-12	4.3011e-08	10.0057
MNDA	0.390902	1.06426e-09	1.78147e-05	36.3325
MOB2	-0.408712	9.30027e-08	0.00155677	14.5002
MOBKL1B	0.606481	5.29486e-22	8.86306e-18	42.8667
MOSPD3	-0.429524	8.43266e-07	0.0141154	9.14416
MPEG1	0.329996	1.73253e-06	0.0290009	23.363
MPG	-0.461045	7.96099e-11	1.33259e-06	20.2628
MPZL3	0.73611	1.70302e-12	2.85068e-08	5.54993
MRC1	0.4482	4.49081e-12	7.51716e-08	34.2577
MRPL12	-0.463264	5.46712e-10	9.1514e-06	16.0303
MRPL14	-0.564501	9.74106e-21	1.63056e-16	58.2658
MRPL20	-0.323372	3.86267e-08	0.000646572	77.57
MRPL21	-0.501593	5.80563e-13	9.71805e-09	22.2324
MRPL23	-0.500743	5.45986e-15	9.13926e-11	36.0559
MRPL27	-0.50689	6.41969e-15	1.07459e-10	32.7114
MRPL28	-0.428418	1.71723e-09	2.87447e-05	19.9567
MRPL36	-0.361138	5.31341e-07	0.00889412	18.9244
MRPL38	-0.413933	2.71497e-07	0.00454459	11.9584
MRPL4	-0.451847	1.21157e-08	0.000202804	12.6261
MRPL41	-0.676483	8.76378e-28	1.46697e-23	47.2218
MRPL51	-0.283398	1.23145e-06	0.0206133	84.7822
MRPL53	-0.387883	3.01479e-09	5.04645e-05	31.5768
MRPL54	-0.432035	2.76426e-11	4.62709e-07	33.133
MRPL55	-0.69579	9.40785e-20	1.57478e-15	14.5849
MRPS12	-0.450526	7.02961e-07	0.0117669	7.98055
MRPS17	-0.358826	9.37129e-07	0.0156866	17.6544
MRPS21	-0.342476	3.47387e-09	5.81491e-05	94.6191
MRPS24	-0.591904	9.89109e-20	1.65567e-15	32.4877
MRPS34	-0.4522	1.06615e-10	1.78463e-06	21.5483
MS4A15	-0.401299	1.5384e-08	0.000257512	20.3016
MSI2	0.551254	5.21187e-10	8.72415e-06	8.84666
MSLN	-0.329177	1.68018e-07	0.00281245	40.9797
MSMB	0.494377	6.82602e-10	1.14261e-05	12.3194
MT1G	0.810841	9.44504e-38	1.581e-33	43.4665
MT1X	0.659513	1.92322e-31	3.21928e-27	177.344
MT2A	0.348366	1.80746e-10	3.02551e-06	694.377
MTRNR2L2	-0.6084	9.25443e-11	1.5491e-06	7.29112
MTRNR2L9	-0.413849	1.36149e-10	2.27899e-06	33.985
MUC1	-0.317945	1.53453e-08	0.000256864	168.117
MUC5B	1.15455	5.63524e-12	9.43283e-08	1.69228
MVD	-0.416979	1.37869e-07	0.00230779	12.7091
MXD1	0.708068	5.59751e-17	9.36967e-13	10.619
MXRA5	0.570744	2.60746e-07	0.00436463	4.56805
MYC	0.324447	5.71958e-07	0.00957401	34.1911
MYEOV2	-0.303115	1.27777e-07	0.00213885	111.317
MYH10	0.37106	1.02652e-08	0.00017183	34.0399
MYL12B	-0.291374	1.19671e-07	0.00200318	342.993
MYL5	-0.601886	3.74597e-08	0.000627037	4.61656
MYL6	-0.427897	3.18001e-15	5.32301e-11	1037.94
MYL9	-0.266704	2.22163e-06	0.0371879	158.9
MYO10	0.423536	1.20498e-06	0.0201702	9.26505
MYO1E	0.461192	6.4957e-07	0.0108731	7.68541
MYO9A	0.952669	4.51935e-11	7.56495e-07	2.39389
MYOF	0.430633	3.98219e-10	6.66579e-06	24.1381
MZT2A	-0.350936	5.66793e-07	0.00948755	21.2595
MZT2B	-0.428408	1.04579e-09	1.75055e-05	21.1958
NAA10	-0.48847	1.30382e-12	2.18247e-08	23.4086
NAMPT	0.491547	4.43067e-17	7.4165e-13	88.7084
NAPSA	-0.319786	4.83751e-09	8.09751e-05	517.049
NAT14	-0.551988	6.68338e-09	0.000111873	6.90228
NAT9	-0.460135	5.1408e-09	8.60519e-05	12.983
NBPF1	0.530453	3.10983e-08	0.000520555	7.03476
NBPF10	0.696513	3.48192e-18	5.82839e-14	12.9145
NBPF24	1.05467	4.57557e-08	0.000765904	1.14877
NBPF9	0.436191	1.1469e-07	0.0019198	11.4132
NCKAP1L	0.362383	2.5684e-07	0.00429925	21.4301
NCOA2	0.780222	1.87676e-11	3.1415e-07	4.14541
NCOA7	0.496961	4.0053e-16	6.70448e-12	54.9363
NCOR1	0.430153	1.96754e-07	0.00329347	11.2606
NDNF	0.374095	1.56843e-09	2.62539e-05	47.5018
NDUFA11	-0.403764	6.25377e-11	1.04682e-06	47.4108
NDUFA12	-0.347721	4.90821e-09	8.21585e-05	69.1255
NDUFA13	-0.494301	2.3068e-18	3.86136e-14	148.742
NDUFA2	-0.350774	6.53052e-09	0.000109314	57.447
NDUFA3	-0.415489	2.61344e-13	4.37464e-09	134.085
NDUFA4	-0.309858	3.88557e-07	0.00650406	52.6972
NDUFA7	-0.630037	6.95263e-21	1.1638e-16	26.9779
NDUFAB1	-0.545448	8.2173e-20	1.37549e-15	64.5596
NDUFB10	-0.387268	2.46203e-10	4.12118e-06	51.7356
NDUFB11	-0.418263	1.60798e-12	2.6916e-08	72.4016
NDUFB2	-0.526672	1.10525e-20	1.85007e-16	154.161
NDUFB6	-0.394632	7.54513e-10	1.26298e-05	36.0251
NDUFB7	-0.656911	1.34104e-28	2.24477e-24	73.3067
NDUFB9	-0.392189	1.213e-11	2.03044e-07	97.9274
NDUFC2	-0.370554	1.99043e-07	0.00333178	19.8296
NDUFS3	-0.41923	1.54796e-10	2.59113e-06	31.1805
NDUFS5	-0.418535	5.78935e-14	9.69079e-10	217.842
NDUFS6	-0.275271	2.72159e-06	0.0455568	79.6988
NDUFS7	-0.477785	7.94069e-14	1.32919e-09	36.5988
NDUFS8	-0.516807	6.34164e-14	1.06153e-09	23.3552
NDUFV1	-0.418872	9.63488e-11	1.61278e-06	33.588
NECAB3	-0.418697	8.11661e-07	0.0135864	9.82928
NEDD8	-0.407054	8.47448e-13	1.41854e-08	129.495
NEDD9	0.341176	2.33539e-08	0.00039092	53.855
NEK6	0.394552	1.11451e-07	0.00186558	16.6889
NFATC2	0.966702	3.78465e-14	6.33513e-10	3.29458
NFIC	0.393553	1.85469e-08	0.000310457	22.1249
NFIL3	0.367729	3.24719e-08	0.000543548	28.9026
NFKBIZ	0.59137	6.95051e-22	1.16345e-17	52.088
NGFRAP1	-0.281139	1.58042e-06	0.0264546	82.0928
NHP2L1	-0.348771	4.78821e-08	0.000801498	36.7241
NHSL2	1.1628	6.70596e-11	1.12251e-06	1.44004
NINJ2	-0.501315	2.42335e-10	4.05645e-06	12.8049
NIPAL2	0.456502	1.99137e-06	0.0333335	6.76301
NKD1	0.618574	1.73112e-07	0.00289772	3.87199
NKG7	-0.487739	5.98868e-13	1.00244e-08	25.7224
NME2	-0.424458	3.32599e-14	5.56738e-10	191.233
NME3	-0.765516	1.90347e-25	3.18621e-21	17.4344
NMRAL1	-0.525969	8.41505e-10	1.4086e-05	9.57309
NOL3	-0.486917	3.06687e-09	5.13364e-05	11.0957
NOP10	-0.507864	5.01785e-19	8.39937e-15	128.378
NOSIP	-0.374803	2.0237e-07	0.00338747	18.6584
NOTCH2NL	0.501642	2.18993e-08	0.000366573	8.52882
NPC2	-0.331103	1.37746e-09	2.30574e-05	512.193
NPEPL1	-0.480263	2.96362e-11	4.96081e-07	18.5756
NPFF	-0.784727	2.89367e-09	4.84372e-05	2.81925
NPM3	-0.425459	1.01125e-06	0.0169274	9.13071
NR2F1	0.430535	2.71181e-08	0.000453929	14.1398
NR4A1	0.33457	2.08297e-09	3.48669e-05	224.316
NR4A3	0.376512	3.84142e-08	0.000643015	24.7087
NRN1L	-0.805208	3.545e-07	0.00593398	1.8262
NRP2	0.537557	1.27551e-11	2.13508e-07	12.8627
NT5C	-0.367863	1.344e-06	0.0224973	14.821
NTHL1	-0.506343	3.37705e-08	0.000565285	7.7991
NTRK2	0.837209	4.34784e-08	0.000727785	2.00973
NUBP2	-0.563692	4.89101e-13	8.18707e-09	13.4848
NUDT1	-0.411265	8.35431e-07	0.0139843	10.4241
NUDT22	-0.426911	3.55377e-07	0.00594866	10.4625
NUDT3	0.598818	3.02002e-14	5.0552e-10	13.2792
NUDT4	0.676658	3.47712e-13	5.82035e-09	7.6916
NUP98	0.369793	2.5804e-06	0.0431933	13.2506
NUPR1	-0.380247	2.4103e-11	4.0346e-07	128.575
NUTF2	-0.347304	2.16727e-08	0.000362779	45.7386
OAS3	0.458829	2.81817e-08	0.000471733	11.1588
OAZ1	-0.402538	2.5827e-13	4.32318e-09	348.752
OGFR	-0.370291	6.19954e-07	0.0103774	16.438
OGFRL1	0.485607	3.37554e-08	0.000565032	9.13568
OSM	0.524333	4.43533e-07	0.0074243	5.50482
OSMR	0.500926	1.65318e-11	2.76726e-07	16.641
PALM2-AKAP2	1.07225	7.42386e-16	1.24268e-11	2.98391
PALM3	-0.783221	1.66446e-14	2.78615e-10	5.72917
PAM16	-0.560852	7.08456e-14	1.18589e-09	15.8465
PANK3	0.816993	2.28565e-11	3.82594e-07	3.61806
PARL	-0.333218	6.17946e-07	0.0103438	27.7691
PARM1	0.326356	1.02902e-06	0.0172248	28.2054
PARP10	-0.455471	4.44599e-10	7.44214e-06	17.6853
PARP4	0.454749	1.78566e-10	2.98902e-06	20.0512
PCBP4	-0.417387	8.6203e-07	0.0144295	9.87794
PCDH17	0.450692	1.8348e-06	0.0307126	7.14195
PCDHGB7	0.657296	3.05074e-09	5.10664e-05	4.64407
PCP2	-0.833828	7.11836e-09	0.000119154	2.26572
PCSK5	0.662392	2.52136e-08	0.00042205	3.83388
PCYT1A	0.410481	7.28143e-09	0.000121884	20.5361
PDCD6	-0.317044	6.00282e-07	0.0100481	38.2143
PDE4B	0.42896	1.52499e-07	0.00255269	11.5318
PDE4DIP	0.345422	2.86664e-06	0.0479847	17.1871
PDLIM2	-0.308973	2.66745e-06	0.0446504	30.1523
PDZD8	0.688544	4.3968e-10	7.3598e-06	4.72074
PDZK1IP1	-0.510476	1.04583e-13	1.75061e-09	23.9218
PEBP1	-0.272454	2.05697e-06	0.0344316	111.173
PEBP4	-0.555808	7.9007e-22	1.3225e-17	98.7161
PEF1	-0.419826	2.10315e-09	3.52046e-05	21.525
PEX16	-0.496817	2.79257e-07	0.00467449	6.53218
PFDN2	-0.448303	3.57915e-14	5.99113e-10	72.9459
PFDN5	-0.38661	2.26187e-12	3.78615e-08	329.121
PFN1	-0.38042	4.21569e-12	7.05665e-08	393.846
PGAP2	-0.407073	2.98105e-06	0.0498998	9.08328
PGAP3	-0.421623	2.93515e-07	0.00491315	11.0595
PGLS	-0.371542	9.53854e-08	0.00159666	22.2283
PHACTR1	0.450611	1.72124e-07	0.00288118	9.75851
PHLDA1	0.399659	1.97036e-07	0.00329819	14.5388
PHPT1	-0.45083	7.55069e-11	1.26391e-06	22.645
PIDD	-0.674392	6.63932e-09	0.000111136	3.9041
PIGQ	-0.402958	7.78216e-07	0.0130266	11.3732
PILRB	-0.477633	3.55589e-12	5.95221e-08	23.6509
PLA2G1B	-0.618693	5.04086e-20	8.43789e-16	26.3867
PLA2G2A	1.40137	8.31855e-103	1.39244e-98	38.6135
PLA2G4B	-0.995199	9.47218e-20	1.58555e-15	4.79176
PLAC9	-0.453469	3.57552e-13	5.98506e-09	43.8126
PLAU	-0.507073	2.86105e-12	4.78911e-08	18.0779
PLEKHJ1	-0.499776	8.59197e-13	1.43821e-08	21.7637
PLIN1	1.18112	8.2939e-09	0.000138832	1.01979
PLLP	-0.326315	1.69561e-06	0.0283828	24.7688
PLP2	-0.329195	4.98658e-08	0.000834704	58.272
PLTP	0.439654	1.95624e-11	3.27455e-07	32.1459
PLXDC2	0.453473	6.01949e-10	1.0076e-05	17.7399
PLXNA2	0.41351	2.25763e-06	0.0377905	9.23987
PMF1	-0.36855	4.1664e-08	0.000697414	26.7914
PMM1	-0.42634	1.11539e-09	1.86705e-05	21.5583
PNISR	0.286217	2.56796e-06	0.0429851	55.4899
PNKD	-0.370146	7.19899e-09	0.000120504	36.3136
PNPLA2	-0.311191	1.62174e-06	0.0271463	33.2341
PNPLA6	-0.312816	7.71272e-07	0.0129103	39.3063
POC1B-GALNT4	-1.03921	3.52081e-07	0.00589349	0.973552
PODN	0.381996	3.30262e-08	0.000552826	23.3993
PODXL	0.442523	2.0979e-10	3.51167e-06	22.4043
POLD4	-0.628862	9.64446e-24	1.61439e-19	43.1647
POLE4	-0.300909	2.66515e-06	0.044612	36.0001
POLR2G	-0.402774	2.00722e-10	3.35988e-06	39.1948
POLR2H	-0.551915	1.576e-15	2.63806e-11	22.8062
POP5	-0.369932	2.81336e-07	0.00470928	18.7844
POSTN	0.482021	1.64445e-14	2.75265e-10	43.1643
PPDPF	-0.477965	8.17133e-16	1.3678e-11	69.796
PPFIBP1	0.366732	2.78481e-07	0.0046615	19.8674
PPIA	-0.356291	2.56363e-10	4.29126e-06	159.881
PPM1L	0.85274	1.99565e-06	0.0334052	1.33711
PPP1R12C	-0.424146	1.46625e-09	2.45436e-05	21.3617
PPP1R14A	-0.324647	1.46633e-06	0.0245448	26.1747
PPP1R15B	0.396034	5.32893e-09	8.9201e-05	25.8052
PPP1R16A	-0.46906	4.37331e-07	0.00732048	7.4379
PPP4C	-0.337583	1.79455e-07	0.00300389	33.6914
PPP4R2	0.378789	2.02779e-07	0.00339431	17.9667
PPTC7	0.427149	1.73111e-07	0.0028977	11.568
PQBP1	-0.416951	2.68248e-11	4.49021e-07	42.8611
PRDX1	-0.360092	6.50743e-11	1.08928e-06	319.921
PRDX5	-0.470021	5.88396e-17	9.84916e-13	173.93
PRKAR2A	0.841124	3.22341e-20	5.39566e-16	8.33167
PRKCDBP	-0.470721	3.86505e-12	6.46971e-08	25.4971
PRKCZ	-0.325308	7.41953e-07	0.0124196	30.4475
PRKG1	0.533046	1.68188e-06	0.028153	4.49962
PRLH	-1.31767	5.3725e-08	0.000899302	0.575082
PRMT1	-0.3045	9.56485e-07	0.0160106	45.2469
PRODH	-0.502636	5.32539e-14	8.91417e-10	27.5916
PRPF8	0.337653	2.48165e-07	0.00415404	31.885
PRR13	-0.324238	3.71962e-08	0.000622627	76.8935
PRR14	-0.366823	2.10129e-06	0.0351735	13.879
PRR15L	-0.471491	2.0435e-07	0.00342062	7.98723
PRRC2C	0.417564	1.14438e-08	0.000191557	17.9264
PRSS8	-0.508366	3.01865e-15	5.05292e-11	34.6945
PSENEN	-0.37452	1.58096e-09	2.64637e-05	45.8077
PSMA7	-0.273736	2.19929e-06	0.036814	98.4415
PSMB1	-0.317451	3.36776e-08	0.000563729	108.173
PSMB10	-0.40033	6.24345e-10	1.04509e-05	33.6902
PSMB3	-0.519583	2.67991e-18	4.4859e-14	67.911
PSMB4	-0.302793	1.56583e-07	0.00262104	100.983
PSMB6	-0.379374	5.52234e-10	9.24385e-06	51.8738
PSMC5	-0.282884	1.91168e-06	0.0319996	69.2906
PSMD13	-0.31	2.04025e-06	0.0341518	31.9845
PSMD4	-0.295141	1.41742e-06	0.0237261	51.4861
PSME2	-0.544877	1.67566e-21	2.80489e-17	119.133
PSMG2	-0.333871	1.80222e-07	0.00301673	36.5334
PSMG3	-0.487147	6.75293e-09	0.000113037	10.2901
PTGFRN	0.46236	2.06631e-06	0.0345879	6.66062
PTGIS	0.442114	2.86249e-07	0.00479153	9.72698
PTGS2	0.568551	1.37188e-18	2.29639e-14	35.3973
PTP4A1	0.341321	1.54452e-08	0.000258537	60.7335
PTPLB	0.772963	5.2603e-24	8.80521e-20	14.9825
PTPN11	0.330468	1.31582e-06	0.0220255	24.7957
PTPN13	0.405581	1.43501e-07	0.00240206	14.3843
PTPRC	0.31576	3.63939e-07	0.00609197	45.8244
PTPRCAP	-0.876346	2.4088e-33	4.03208e-29	18.2299
PTPRG	0.686618	1.19261e-10	1.99632e-06	5.18119
PTPRK	0.401463	3.5871e-07	0.00600445	13.0952
PTPRM	0.392971	7.67519e-09	0.000128475	25.3845
PTRHD1	-0.416966	7.01293e-11	1.17389e-06	36.4662
PTTG1	-0.435896	6.07035e-07	0.0101612	9.03588
PTX3	0.662497	3.15942e-09	5.28855e-05	4.46722
PYCARD	-0.439482	7.17805e-12	1.20153e-07	35.9844
QTRT1	-0.486418	1.52187e-10	2.54746e-06	14.8806
RAB11FIP1	0.285704	1.57003e-06	0.0262807	69.9299
RAB17	-0.521653	1.422e-10	2.38029e-06	11.5123
RAB24	-0.59567	2.64657e-15	4.4301e-11	15.5329
RAB34	-0.317175	2.19546e-06	0.0367499	27.2311
RAB40C	-0.419406	2.58937e-06	0.0433435	8.35429
RAB4B	-0.32938	1.61302e-06	0.0270003	23.7526
RABAC1	-0.487889	2.22527e-16	3.72488e-12	69.2383
RAD23B	0.301716	9.17961e-07	0.0153657	50.3857
RAD54L2	0.739989	1.99607e-10	3.34122e-06	4.13118
RAD9A	-0.475015	1.02021e-06	0.0170774	6.4149
RALGAPA2	0.4304	2.32379e-06	0.0388979	8.06299
RAMP1	-0.556845	7.4127e-08	0.00124081	5.39678
RAMP2	-0.330827	2.19857e-08	0.000368019	74.3288
RAMP3	-0.420119	6.21281e-11	1.03996e-06	35.8258
RANBP2	0.398094	1.2371e-06	0.0207079	11.4486
RANGRF	-0.464188	2.81799e-09	4.71703e-05	13.4114
RAPGEF2	0.439423	1.50421e-07	0.00251789	10.7041
RARRES1	0.332413	9.69595e-07	0.0162301	25.91
RARRES2	-0.329354	3.05909e-09	5.12062e-05	236.598
RARRES3	-0.387923	8.74147e-11	1.46323e-06	64.6888
RASA2	0.591353	1.23785e-06	0.0207203	3.51855
RASEF	0.870164	3.67001e-13	6.14324e-09	3.87433
RASGEF1B	0.413472	1.56404e-09	2.61805e-05	24.4813
RASSF7	-0.924482	4.88305e-42	8.17374e-38	25.5019
RBM14-RBM4	0.454079	9.34741e-11	1.56466e-06	21.689
RBP1	-0.356729	2.26185e-06	0.0378611	15.2845
RBX1	-0.334602	2.46039e-08	0.000411846	62.0045
RC3H2	0.771406	5.24006e-10	8.77133e-06	3.44008
RCAN3	0.623574	5.228e-10	8.75115e-06	6.14158
REL	1.14631	8.77347e-25	1.46859e-20	4.84826
RETN	-0.923587	5.66368e-50	9.48044e-46	46.897
RFNG	-0.456382	7.50266e-07	0.0125587	7.56492
RFXANK	-0.373979	1.79209e-06	0.0299978	13.2374
RGL3	-0.405874	6.86884e-08	0.00114978	15.5093
RGP1	0.525397	4.91063e-10	8.21991e-06	10.514
RHBDD2	-0.335316	5.98688e-08	0.00100214	46.9424
RHOC	-0.313396	1.80972e-07	0.0030293	61.57
RHOT2	-0.35824	1.04771e-07	0.00175376	26.2537
RIMKLB	0.527891	3.19116e-09	5.34168e-05	8.68194
RNASE1	-0.332245	1.24756e-09	2.08829e-05	481.713
RNASEK	-0.306162	9.8965e-08	0.00165657	109.014
RND1	0.409121	5.76618e-11	9.652e-07	44.8842
RNF166	-0.444156	9.82677e-08	0.0016449	10.6962
RNF181	-0.551855	4.49362e-19	7.52187e-15	47.3528
RNF213	0.513785	7.99584e-13	1.33842e-08	19.7108
RNF24	0.693591	5.47996e-09	9.17291e-05	3.84269
RNH1	-0.329156	5.53141e-08	0.000925902	56.4825
ROCK2	0.572923	2.8871e-11	4.83271e-07	9.71759
ROGDI	-0.389156	9.91414e-08	0.00165953	17.6223
ROR1	0.694464	1.14121e-09	1.91026e-05	4.2922
ROS1	0.493912	1.64217e-10	2.74883e-06	14.2906
RP9	-0.552151	2.31041e-08	0.000386739	6.12536
RPL10A	-0.264752	1.30919e-06	0.0219146	467.391
RPL11	-0.269985	6.58393e-07	0.0110208	945.795
RPL12	-0.432162	1.94612e-15	3.25761e-11	794.02
RPL13	-0.449058	1.13773e-14	1.90445e-10	90.9095
RPL13A	-0.331688	3.51505e-09	5.88384e-05	171.875
RPL18	-0.515275	3.60634e-21	6.03666e-17	614.81
RPL18A	-0.49473	1.32577e-19	2.21921e-15	564.536
RPL19	-0.370291	1.08285e-11	1.81258e-07	650.218
RPL21	-1.3309	3.15585e-70	5.28258e-66	16.3049
RPL23	-0.291651	7.19274e-08	0.00120399	1437.54
RPL23A	-0.347275	2.17696e-10	3.64402e-06	483.168
RPL24	-0.414061	2.39488e-14	4.00879e-10	1004.03
RPL26	-0.378656	3.02056e-12	5.05612e-08	1017.37
RPL26L1	-0.436651	1.42187e-09	2.38007e-05	18.7481
RPL27	-0.785987	1.75985e-47	2.94582e-43	1546.4
RPL27A	-0.292711	5.90887e-07	0.00989085	81.3923
RPL28	-0.463808	4.58307e-17	7.67159e-13	296.364
RPL29	-0.27604	4.57026e-07	0.00765016	461.04
RPL31	-0.340229	3.24014e-10	5.42367e-06	1639.79
RPL32	-0.403924	7.46227e-13	1.24911e-08	160.957
RPL35	-0.73169	3.86228e-41	6.46507e-37	876.069
RPL35A	-0.378628	2.81684e-12	4.71511e-08	1280.49
RPL36	-0.374178	5.8474e-12	9.78796e-08	833.896
RPL36AL	-0.596161	1.99182e-27	3.33411e-23	401.092
RPL37	0.476098	6.3814e-17	1.06818e-12	142.615
RPL41	-0.405146	6.3984e-14	1.07103e-09	2909.52
RPL7A	-0.304089	2.36864e-08	0.000396487	665.472
RPL7L1	0.321235	1.02776e-06	0.0172038	31.0869
RPL8	-0.447178	2.07511e-16	3.47353e-12	767.509
RPL9	-0.383592	1.55675e-12	2.60585e-08	1052.15
RPLP1	-0.683277	1.86634e-36	3.12406e-32	1988.63
RPLP2	-0.809227	3.44641e-50	5.76895e-46	1517.95
RPS10	-0.525473	5.48034e-22	9.17354e-18	671.013
RPS11	-0.265595	9.21774e-07	0.0154296	1573.56
RPS12	-0.717031	6.4678e-40	1.08264e-35	1793.47
RPS13	-0.295457	5.19924e-08	0.0008703	999.976
RPS14	-0.267876	7.75997e-07	0.0129894	1151.78
RPS15	-0.60551	1.49928e-28	2.50964e-24	589.249
RPS15A	-0.518699	1.02483e-21	1.71547e-17	1548.92
RPS16	-0.258212	2.00352e-06	0.0335369	871.734
RPS17	-0.356608	5.58513e-11	9.34895e-07	754.187
RPS17L	-0.355991	6.02553e-11	1.00861e-06	754.199
RPS19	-0.387235	2.27779e-12	3.81279e-08	303.082
RPS19BP1	-0.494678	2.19819e-13	3.67956e-09	26.3661
RPS2	-0.334909	8.32696e-10	1.39385e-05	584.647
RPS20	-0.505587	1.54119e-20	2.57979e-16	785.645
RPS23	-0.27969	9.90018e-07	0.0165719	119.609
RPS24	-0.504063	1.48838e-20	2.4914e-16	1233.35
RPS25	-0.548968	3.77891e-24	6.32552e-20	1765.37
RPS26	-0.568689	1.01185e-24	1.69373e-20	270.396
RPS27A	-0.442267	6.47708e-16	1.0842e-11	475.469
RPS3A	-0.438025	7.204e-16	1.20588e-11	991.283
RPS4X	-0.393543	4.6445e-13	7.77443e-09	789.755
RPS4Y1	-0.335316	1.41007e-09	2.36032e-05	263.678
RPS5	-0.308809	2.30429e-08	0.000385715	283.344
RPS6KB2	-0.430149	1.08905e-07	0.00182297	11.6827
RPS7	-0.48995	3.13661e-19	5.25037e-15	532.946
RPS8	-0.320348	3.82394e-09	6.40089e-05	796.443
RPS9	-0.314789	6.65969e-09	0.000111477	969.491
RPSA	-0.36639	3.85552e-11	6.45375e-07	255.449
RRAS	-0.445256	6.75672e-14	1.13101e-09	69.401
RSF1	0.464993	1.20153e-06	0.0201124	6.93703
RUNDC2A	0.765736	2.14536e-08	0.000359112	2.69105
S100A10	-0.319827	5.8313e-09	9.76102e-05	374.351
S100A13	-0.48877	3.29833e-17	5.52107e-13	96.2093
S100A14	-0.514202	1.21691e-17	2.03698e-13	60.7722
S100A16	-0.334722	8.83899e-08	0.00147956	42.7493
S100A4	-0.502335	2.09438e-20	3.50578e-16	1140.05
S100A6	-0.784778	3.22874e-47	5.40459e-43	1202.51
S100A8	0.69377	2.81232e-34	4.70754e-30	157.286
S100A9	0.275133	7.54438e-07	0.0126285	243.765
SAA1	0.839052	1.45481e-32	2.43521e-28	21.7567
SAA2	0.83972	2.47592e-13	4.14443e-09	4.26785
SAMHD1	0.523098	7.63287e-18	1.27767e-13	56.997
SAP25	-0.87816	2.29866e-19	3.84772e-15	6.60937
SAT2	-0.366222	9.93976e-09	0.000166382	36.6403
SCAND1	-0.767509	3.59977e-25	6.02565e-21	16.7669
SCGB3A1	-0.875668	9.96588e-57	1.66819e-52	374.709
SCGB3A2	-0.259046	1.87166e-06	0.0313297	821.165
SCO2	-0.473963	1.30989e-09	2.19262e-05	13.4662
SDF2	-0.364238	1.5025e-07	0.00251503	22.7278
SDR39U1	-0.478016	4.06307e-10	6.80118e-06	14.5333
SEC61B	-0.592675	1.4279e-25	2.39016e-21	142.941
SEC61G	0.271433	1.05214e-06	0.0176118	255.018
SELE	0.810398	4.95336e-23	8.29144e-19	12.0663
SELENBP1	-0.425784	6.39711e-14	1.07081e-09	135.65
SELK	-0.429533	2.57927e-13	4.31744e-09	80.3138
SELL	0.493922	1.78844e-08	0.000299366	8.99076
SELO	-0.430038	1.66851e-06	0.0279291	8.30672
SELP	0.486087	2.55699e-07	0.00428015	7.20973
SELS	-0.297585	1.69036e-06	0.0282949	45.3267
SEMA3B	-0.468009	4.87747e-13	8.1644e-09	33.6229
SEPW1	-0.540417	5.94119e-22	9.94495e-18	180.457
SERPINB6	-0.33034	4.23486e-08	0.000708873	59.7596
SERPINB9	0.410218	6.84307e-08	0.00114546	15.0279
SERPIND1	0.777594	3.39554e-07	0.0056838	2.04094
SERPINE1	0.958102	1.04581e-40	1.75059e-36	20.3863
SESN3	1.00212	2.39064e-12	4.00169e-08	2.50597
SF3B14	-0.306692	2.08485e-07	0.00348982	74.2981
SF3B5	-0.435596	6.22958e-13	1.04277e-08	56.9335
SFPQ	0.30861	3.41679e-07	0.00571937	58.762
SFRP4	-0.683806	1.02843e-19	1.72148e-15	15.7347
SFT2D2	0.667251	2.55444e-14	4.27587e-10	9.34132
SFTPC	-0.612297	8.08826e-30	1.35389e-25	12199.9
SGK1	0.290181	7.65682e-07	0.0128168	82.8225
SGMS2	0.606994	1.46751e-17	2.45646e-13	20.4498
SGPP2	0.829032	1.7526e-19	2.93368e-15	8.19642
SH2B1	-0.415238	6.63755e-08	0.00111106	14.2084
SH3BGRL3	-0.485864	6.029e-17	1.00919e-12	93.0259
SH3PXD2A	0.384549	2.48975e-06	0.0416759	11.5648
SH3PXD2B	0.609696	2.90584e-09	4.86409e-05	5.69161
SHARPIN	-0.474084	2.51841e-09	4.21557e-05	12.4851
SHFM1	-0.32341	5.31055e-09	8.88933e-05	259.196
SHROOM4	0.539689	8.90138e-10	1.49e-05	9.08816
SIGIRR	-0.451214	4.50048e-09	7.53335e-05	14.2266
SIK2	0.621502	1.18592e-13	1.98511e-09	10.9003
SIPA1L1	0.472238	4.35961e-07	0.00729755	7.48799
SIRT7	-0.383039	2.53458e-06	0.0424263	11.4824
SIVA1	-0.479852	1.43187e-13	2.39681e-09	33.0858
SKIL	0.727374	2.47748e-19	4.14705e-15	12.5205
SLC19A1	-0.530375	1.14834e-11	1.9222e-07	13.3725
SLC22A31	-0.718642	4.84291e-21	8.10654e-17	14.6574
SLC25A25	0.339171	7.69145e-07	0.0128747	24.4627
SLC25A29	-0.357267	7.00952e-07	0.0117332	18.8175
SLC25A39	-0.447544	4.00003e-11	6.69566e-07	25.5074
SLC2A3	0.419622	3.25729e-12	5.45238e-08	61.7395
SLC30A1	0.730159	3.02352e-13	5.06106e-09	6.2285
SLC39A4	-0.666215	1.63184e-08	0.000273153	3.7809
SLC6A14	0.550727	1.49939e-14	2.50983e-10	19.8329
SLCO4A1	0.675714	2.85679e-07	0.00478197	2.87604
SLFN5	0.749848	1.30946e-19	2.19191e-15	11.5198
SLIT2	0.54171	1.05774e-13	1.77055e-09	18.1767
SLIT3	0.643695	3.24995e-17	5.44008e-13	15.0956
SLK	0.35162	8.57609e-07	0.0143555	19.7938
SLPI	-0.316998	5.30201e-09	8.87503e-05	919.19
SMC1A	0.41441	2.30132e-06	0.0385218	9.10846
SMN2	0.678637	1.08562e-08	0.000181723	3.79818
SMOC2	0.493792	4.92039e-08	0.000823625	8.26506
SNRNP35	-0.355738	4.61355e-07	0.00772262	20.7195
SNRPA	-0.424616	3.07129e-08	0.000514104	14.3827
SNRPD2	-0.414249	2.545e-12	4.26007e-08	72.485
SNRPN	-0.302638	7.22783e-07	0.0120987	52.5215
SNURF	0.347567	1.03118e-08	0.000172609	57.4467
SNX30	0.349153	2.41902e-06	0.040492	16.9699
SOCS2	0.319642	9.42381e-07	0.0157745	32.9332
SOCS3	0.543105	1.25423e-21	2.09946e-17	150.468
SOD2	0.727435	8.2009e-38	1.37275e-33	176.726
SORL1	0.485922	1.07089e-07	0.00179256	7.99523
SOX7	0.353351	1.28473e-06	0.0215052	17.9126
SPAG7	-0.426604	3.89079e-11	6.51279e-07	34.3065
SPCS1	-0.306965	4.09178e-07	0.00684924	56.5122
SPEN	0.523782	8.77534e-10	1.4689e-05	9.99163
SPINK1	-0.715544	4.25168e-08	0.000711689	2.95339
SPINT2	-0.440124	4.30574e-14	7.20738e-10	87.931
SPNS1	-0.464434	1.11669e-10	1.86923e-06	18.8792
SPON1	0.43571	1.8448e-09	3.08801e-05	18.589
SPP1	0.998737	1.14926e-43	1.92375e-39	20.0734
SPSB1	0.450685	2.31561e-06	0.0387609	6.99595
SPSB2	-0.627996	1.01115e-12	1.69256e-08	8.80761
SPSB3	-0.791925	3.3813e-29	5.65996e-25	20.9263
SPTBN1	0.447136	8.35679e-15	1.39884e-10	111.647
SRPX	0.466313	1.62256e-08	0.000271601	11.1808
SS18L2	-0.363771	2.11211e-07	0.00353546	21.5173
SSBP1	-0.402548	4.5416e-12	7.60218e-08	90.6413
SSH1	0.524831	6.51662e-11	1.09082e-06	12.2319
SSH2	0.460246	3.62329e-07	0.00606503	8.26812
SSNA1	-0.470195	6.87939e-12	1.15154e-07	24.044
SSR4	-0.38843	1.378e-11	2.30664e-07	108.222
SSSCA1	-0.454278	2.14639e-09	3.59284e-05	15.0508
ST3GAL1	0.384116	2.53351e-07	0.00424084	16.4519
ST8SIA6	0.917648	4.77648e-10	7.99536e-06	2.24904
STARD10	-0.398259	6.90612e-07	0.0115602	12.1076
STAT3	0.466753	9.07401e-15	1.5189e-10	62.8214
STATH	5.0843	5.86071e-137	9.81024e-133	3.18607
STEAP4	0.438333	1.9159e-13	3.20702e-09	69.9825
STK17B	0.374816	2.79621e-08	0.000468058	26.468
STRA13	-0.738305	4.28484e-26	7.1724e-22	21.9547
STT3B	0.405889	5.61117e-10	9.39254e-06	31.8059
STUB1	-0.324959	1.45282e-06	0.0243188	26.1897
STX10	-0.31106	8.86917e-07	0.0148461	39.2704
STX8	-0.684862	4.07686e-25	6.82425e-21	29.75
SULF2	0.546111	1.4112e-10	2.3622e-06	10.1879
SULT1A1	-0.435182	1.04936e-11	1.75652e-07	36.3472
SULT1A2	-0.566947	1.02387e-09	1.71385e-05	7.49362
SUMO1	-0.281039	1.97039e-06	0.0329823	74.3152
SUPT4H1	-0.323311	1.27289e-06	0.0213069	27.9843
SURF1	-0.378776	3.15693e-08	0.000528438	24.21
SURF2	-0.523527	2.56871e-09	4.29976e-05	8.89115
SUSD2	-0.319015	4.42551e-08	0.000740786	87.769
SVEP1	0.515445	4.78688e-08	0.000801276	7.20945
SVIL	0.341263	1.48435e-06	0.0248465	20.5785
SWAP70	0.368726	1.20988e-07	0.00202522	22.2895
SYNE1	0.508283	2.0516e-07	0.00343417	6.56464
SYNGR2	-0.351727	2.89835e-09	4.85155e-05	71.7523
SYT12	-1.48759	2.48325e-08	0.000415671	0.399027
TAF1C	-0.472368	6.26855e-11	1.04929e-06	18.4785
TALDO1	-0.328138	2.17943e-08	0.000364815	81.4707
TANC2	0.471621	1.01337e-06	0.0169628	6.83425
TARBP2	-0.437282	1.62154e-06	0.027143	7.89195
TAZ	-0.474517	4.57159e-09	7.65238e-05	11.7004
TBC1D10C	-0.638894	2.48044e-14	4.152e-10	10.5716
TBC1D16	0.50713	1.17586e-06	0.0196827	5.42922
TBC1D5	0.431044	5.43225e-07	0.00909304	9.68286
TBCB	-0.423664	1.60036e-09	2.67885e-05	21.3037
TBL3	-0.492695	6.45624e-07	0.0108071	6.14745
TCEB2	-0.570991	3.50996e-23	5.87533e-19	107.199
TCF21	-0.319387	2.82513e-07	0.00472899	44.9118
TCIRG1	-0.509371	3.03276e-16	5.07653e-12	44.2934
TCP11L2	0.563205	7.90596e-11	1.32338e-06	9.55553
TECR	-0.360352	1.08817e-08	0.000182149	40.4489
TEX264	-0.467794	2.89822e-10	4.85133e-06	16.5264
TFF1	-1.37419	3.39449e-07	0.00568204	0.415765
TFPI	0.507097	1.08413e-17	1.81473e-13	75.6906
TFPT	-0.42385	1.02201e-06	0.0171074	9.2099
TFRC	0.368922	9.33227e-10	1.56213e-05	60.8116
TGM2	0.349238	9.18004e-10	1.53665e-05	131.366
TGOLN2	0.294711	1.43675e-06	0.0240498	52.5767
THAP3	-0.524506	8.09137e-08	0.00135441	6.36853
THBD	0.291812	2.48102e-06	0.0415299	47.4583
THBS1	0.737357	2.21608e-36	3.7095e-32	93.8518
THBS2	0.530368	3.42588e-09	5.73458e-05	8.59945
THYN1	-0.332999	2.18718e-06	0.0366111	21.0782
TIAF1	-0.973767	3.3707e-10	5.64222e-06	1.8922
TIMM10	-0.40474	6.04144e-09	0.000101128	22.1747
TIMM17B	-0.492649	1.59817e-10	2.67518e-06	14.145
TIPARP	0.427283	5.27229e-10	8.82529e-06	24.0444
TLN1	0.330411	9.54386e-08	0.00159755	47.4756
TLR4	0.422085	5.11914e-07	0.00856892	10.4005
TM7SF2	-0.444482	6.83642e-07	0.0114435	8.35315
TMED3	-0.336953	9.28942e-07	0.0155496	23.7473
TMED8	0.85392	7.94077e-10	1.32921e-05	2.61701
TMEM110-MUSTN1	1.52425	4.29334e-18	7.18662e-14	1.56288
TMEM125	-0.504062	5.82475e-16	9.75005e-12	44.4365
TMEM134	-0.559728	4.35558e-14	7.29081e-10	16.6154
TMEM141	-0.354792	2.34751e-07	0.0039295	23.7745
TMEM14C	-0.304477	4.72408e-07	0.00790763	57.7826
TMEM175	-0.45916	4.71486e-08	0.00078922	10.3
TMEM179B	-0.360559	2.79533e-07	0.0046791	21.2806
TMEM2	0.402382	2.47395e-09	4.14114e-05	26.4753
TMEM204	-0.362979	1.16043e-06	0.0194244	16.206
TMEM205	-0.37927	7.41479e-10	1.24116e-05	48.4785
TMEM208	-0.41929	3.71113e-10	6.21207e-06	27.4922
TMEM219	-0.568906	1.41665e-20	2.37133e-16	52.0909
TMEM222	-0.374409	1.69251e-06	0.028331	13.2951
TMEM54	-0.401587	9.14661e-08	0.00153105	15.5924
TMEM60	-0.442856	1.28719e-09	2.15463e-05	17.8636
TMEM80	-0.440144	2.38458e-06	0.0399154	7.31136
TMEM86B	-0.644792	1.95351e-06	0.0326998	2.61319
TMEM9	-0.385597	7.25329e-09	0.000121413	27.9362
TMSB10	-0.514516	1.96977e-21	3.2972e-17	1937.12
TMSB15A	-0.759446	2.44263e-10	4.08873e-06	3.70244
TMSB4X	-0.723933	6.58521e-41	1.1023e-36	8809.81
TMUB1	-0.516271	1.31606e-10	2.20296e-06	12.0127
TMX4	0.362228	3.18161e-07	0.00532569	20.6009
TNFAIP3	0.691905	5.12599e-26	8.58039e-22	32.3436
TNFRSF10C	0.918789	1.68052e-20	2.81303e-16	6.59368
TNFRSF10D	0.432422	1.14696e-06	0.019199	8.7862
TNFRSF14	-0.574771	1.70963e-17	2.86175e-13	26.1754
TNFRSF25	-0.501313	1.89025e-07	0.0031641	6.66975
TNIP3	1.09428	3.16272e-15	5.29408e-11	2.68074
TNMD	-1.64951	3.23623e-09	5.41712e-05	0.355778
TNNC1	-0.63723	7.57539e-26	1.26804e-21	56.9081
TNNI2	-0.485561	1.06951e-06	0.0179025	6.00335
TOMM6	-0.39094	3.31974e-11	5.55691e-07	75.7112
TOP1	0.393054	7.09107e-10	1.18698e-05	38.0148
TP53BP1	0.482779	2.07408e-06	0.034718	5.87635
TP53I13	-0.58845	7.68869e-14	1.28701e-09	13.0334
TP53INP2	0.411655	4.02653e-08	0.000674001	16.1042
TPM2	-0.302408	3.39221e-07	0.00567822	70.9869
TPPP3	-0.336054	4.76324e-09	7.97319e-05	109.902
TPT1	-0.285564	1.22634e-07	0.00205277	3349.9
TRA2A	-0.365243	8.04573e-10	1.34678e-05	69.2435
TRABD	-0.442486	4.27218e-09	7.1512e-05	15.4664
TRAPPC1	-0.334023	2.22628e-08	0.000372658	65.3356
TRAPPC2L	-0.586533	3.47733e-19	5.8207e-15	31.2571
TRAPPC6A	-0.622215	2.70475e-17	4.52748e-13	17.2578
TREM1	0.301049	6.73385e-07	0.0112718	57.6629
TRIB1	0.421887	2.03288e-11	3.40283e-07	42.4021
TRIM44	0.629559	5.76958e-18	9.65769e-14	18.3046
TRIM56	0.506565	2.98937e-09	5.00391e-05	10.0887
TRIO	0.440581	6.06558e-07	0.0101532	8.89756
TRIP12	0.356676	2.19169e-06	0.0366867	15.6939
TRMT1	-0.431065	6.22961e-08	0.00104277	12.4055
TRMT112	-0.514511	9.64867e-20	1.61509e-15	147.403
TRPM8	-1.53675	1.07167e-06	0.0179388	0.164169
TRPT1	-0.455716	1.20628e-06	0.0201918	7.2008
TSC22D2	0.450135	1.53781e-08	0.000257413	12.7048
TSPAN13	-0.28831	3.64155e-07	0.00609559	141.189
TSPAN4	-0.478472	6.33566e-14	1.06053e-09	37.0755
TSPAN8	-0.449771	1.61207e-10	2.69844e-06	21.0496
TSPO	-0.523075	3.38717e-19	5.66978e-15	86.3431
TST	-0.488032	5.62162e-11	9.41003e-07	16.2327
TSTD1	-0.436987	4.76099e-13	7.96943e-09	58.3019
TTBK2	0.901523	2.04173e-07	0.00341765	1.50573
TXN	-0.499937	1.22835e-19	2.05614e-15	325.089
TXNRD2	-0.421358	3.61944e-07	0.00605858	10.7808
TYROBP	-0.403972	2.88843e-13	4.83494e-09	276.216
U2AF1L4	-0.423793	5.51168e-07	0.009226	10.1397
UBA52	-0.336956	9.43733e-09	0.000157971	79.8728
UBAP2L	0.326789	7.80725e-07	0.0130686	29.9933
UBB	-0.347733	1.52441e-10	2.55171e-06	932.552
UBE2B	-0.341772	2.13457e-07	0.00357306	30.4483
UBE2C	-0.747583	1.4109e-11	2.36171e-07	4.49541
UBL5	-0.455966	1.39778e-16	2.33974e-12	313.677
UBR4	0.516361	2.29862e-09	3.84766e-05	9.71444
UBTD1	-0.420796	2.5415e-08	0.000425422	15.3248
UBXN1	-0.298044	2.056e-06	0.0344155	41.794
UBXN6	-0.36891	3.51166e-08	0.000587817	27.3561
UBXN7	1.10225	1.62239e-18	2.71572e-14	3.53525
UEVLD	0.497762	1.10445e-07	0.00184873	7.40691
UGCG	0.710471	1.56835e-22	2.62526e-18	18.5516
UPK3B	-0.537403	1.56671e-18	2.62251e-14	52.3605
UPK3BL	-0.636346	1.43967e-18	2.40986e-14	18.4845
UQCR10	-0.341653	3.75492e-08	0.000628536	45.2822
USE1	-0.388936	5.69636e-07	0.00953514	13.6439
UTRN	0.47477	5.63565e-11	9.43351e-07	18.7035
UXT	-0.302561	4.93445e-07	0.00825978	60.5236
VAMP5	-0.430337	4.76109e-13	7.96959e-09	68.2841
VAMP8	-0.446785	1.5802e-15	2.64511e-11	183.717
VCAM1	0.468162	2.36262e-09	3.95478e-05	13.1956
VEGFB	-0.328151	4.99337e-07	0.00835841	31.7867
VKORC1L1	0.393363	1.13161e-08	0.00018942	23.8378
VMO1	-0.438207	3.83423e-07	0.00641811	9.50902
VNN2	0.468175	8.59433e-07	0.014386	6.98261
VPS28	-0.459863	2.0841e-14	3.48858e-10	60.892
VPS29	-0.431027	4.30015e-13	7.19802e-09	69.1054
VSIG2	-0.609916	4.16798e-18	6.97678e-14	21.192
VWF	0.586014	2.61659e-22	4.3799e-18	62.168
WBP1	-0.322971	9.73213e-07	0.0162906	29.7481
WDR13	-0.379968	2.23974e-08	0.00037491	25.1182
WDR18	-0.498455	6.08455e-09	0.000101849	9.59824
WDR34	-0.410613	4.4072e-08	0.000737721	15.7142
WDR74	-0.423045	1.79229e-07	0.00300011	11.6686
WFDC2	-0.370021	1.5995e-10	2.67741e-06	97.5858
WISP2	-0.354066	5.59385e-07	0.00936355	20.774
WNK1	0.341724	2.48704e-07	0.00416305	29.567
XAGE1A	-2.26047	4.1981e-40	7.02719e-36	1.88139
XAGE1B	-1.64431	5.53308e-29	9.26182e-25	2.42405
XAGE2B	-0.528292	7.28055e-07	0.0121869	5.04874
YLPM1	0.40573	2.18093e-06	0.0365066	9.90819
YPEL3	-0.299597	1.87761e-06	0.0314293	41.2831
ZAP70	-0.48552	1.95171e-07	0.00326696	7.43314
ZBED3	0.670285	3.48952e-09	5.84111e-05	4.37173
ZBED6	1.47983	5.73602e-18	9.60152e-14	1.65829
ZBTB16	1.03128	1.52134e-30	2.54657e-26	9.11291
ZC3H13	0.590021	6.81299e-13	1.14043e-08	11.5319
ZC3HAV1L	0.624671	2.47061e-06	0.0413556	2.82261
ZDHHC12	-0.413134	2.03486e-06	0.0340615	9.14873
ZFAND2B	-0.452713	3.13132e-08	0.000524152	11.2736
ZFP106	0.497779	1.32456e-10	2.21719e-06	14.0629
ZFP36	0.399802	3.34469e-13	5.59867e-09	483.191
ZFP36L1	0.265164	2.6269e-06	0.0439716	162.703
ZGPAT	-0.503607	1.37487e-10	2.3014e-06	13.204
ZKSCAN1	0.761919	1.83129e-13	3.06539e-09	5.64852
ZNF121	0.651927	1.51712e-08	0.000253951	4.14854
ZNF141	0.682909	4.50394e-08	0.000753914	3.35576
ZNF192	0.629047	2.38624e-08	0.000399433	4.3879
ZNF205	-0.583777	2.56292e-06	0.0429007	3.28512
ZNF32	-0.451057	8.28454e-10	1.38675e-05	17.2582
ZNF331	0.31878	2.71067e-06	0.0453738	25.727
ZNF397	0.456215	2.15799e-07	0.00361226	8.98817
ZNF444	-0.485712	1.01205e-08	0.000169407	9.96278
ZNF524	-0.58812	3.68814e-09	6.17358e-05	6.03792
ZNF593	-0.453586	2.02963e-10	3.3974e-06	19.7173
ZNF688	-0.586408	2.94984e-08	0.000493773	5.0434
ZNF692	-0.587544	3.38676e-11	5.66909e-07	8.61308
ZNF791	0.532017	1.10561e-08	0.000185069	7.63661
ZNHIT1	-0.431891	8.87025e-11	1.48479e-06	28.1444
